# Supplementary material for: Crossing through danger: Spatial drivers of roadkill risk for felids in the fragmented Middle Magdalena valley
Source: Research Square preprint supplement (doi:10.21203/rs.3.rs-7198781/v1), 2025-08-01
Supplement: Supplementary file 1 [file 71aa896972be9114a23092ec.docx]

**Supplementary Material 1.**

**Crossing through danger: Spatial drivers of roadkill risk for felids in the fragmented Middle Magdalena valley**

Julián Arango-Lozano1*, Karime Angarita-Corzo2

1Maestría en Ciencias Biológicas, Universidad de Caldas, Manizales, Colombia

2Escuela de Medicina Veterinaria. Facultad de Ciencias Agrarias. Universidad de Antioquia, Carrera 75 # 65-87, 050034, Medellín, Colombia.

* Corresponding author: [arangolozanoj1@gmail.com](mailto:arangolozanoj1@gmail.com)

**General roadkill database.**

From December 2022 to March 2025, we collected 395 roadkill events of vertebrates in the ruta del sol highway (Puerto Salgar – Barrancabermeja extension). The records were collected with a periodic survey of 2 times per week one person in a car at 70 km/h searching for carcasses. However, given that the highway spans more than 250 km, we also incorporated data provided by residents who submitted photographs of roadkilled animals along with precise geographic coordinates. When possible, for verification purposes, we asked contributors to specify the exact kilometer marker point (PK) which also is indicated along the roadside every kilometer. We only included roadkill records based on our own direct observations and reports from residents that included clearly identifiable carcasses’ photographs and locations.

A total of 396 roadkill events were recorded, distributed across four major taxonomic classes. Mammals were the most affected group, with 244 individuals (61.6% of the total), followed by reptiles with 88 (22.2%), birds with 63 (15.9%), and a single record of an amphibian (*Rhinella marina*). At the species level, *Tamandua mexicana* showed the highest incidence, with 81 individuals killed, followed by *Procyon cancrivorus* (42), *Cerdocyon thous* (41), *Hydrochoerus isthmius* (25), and *Caiman crocodilus* (23).

**
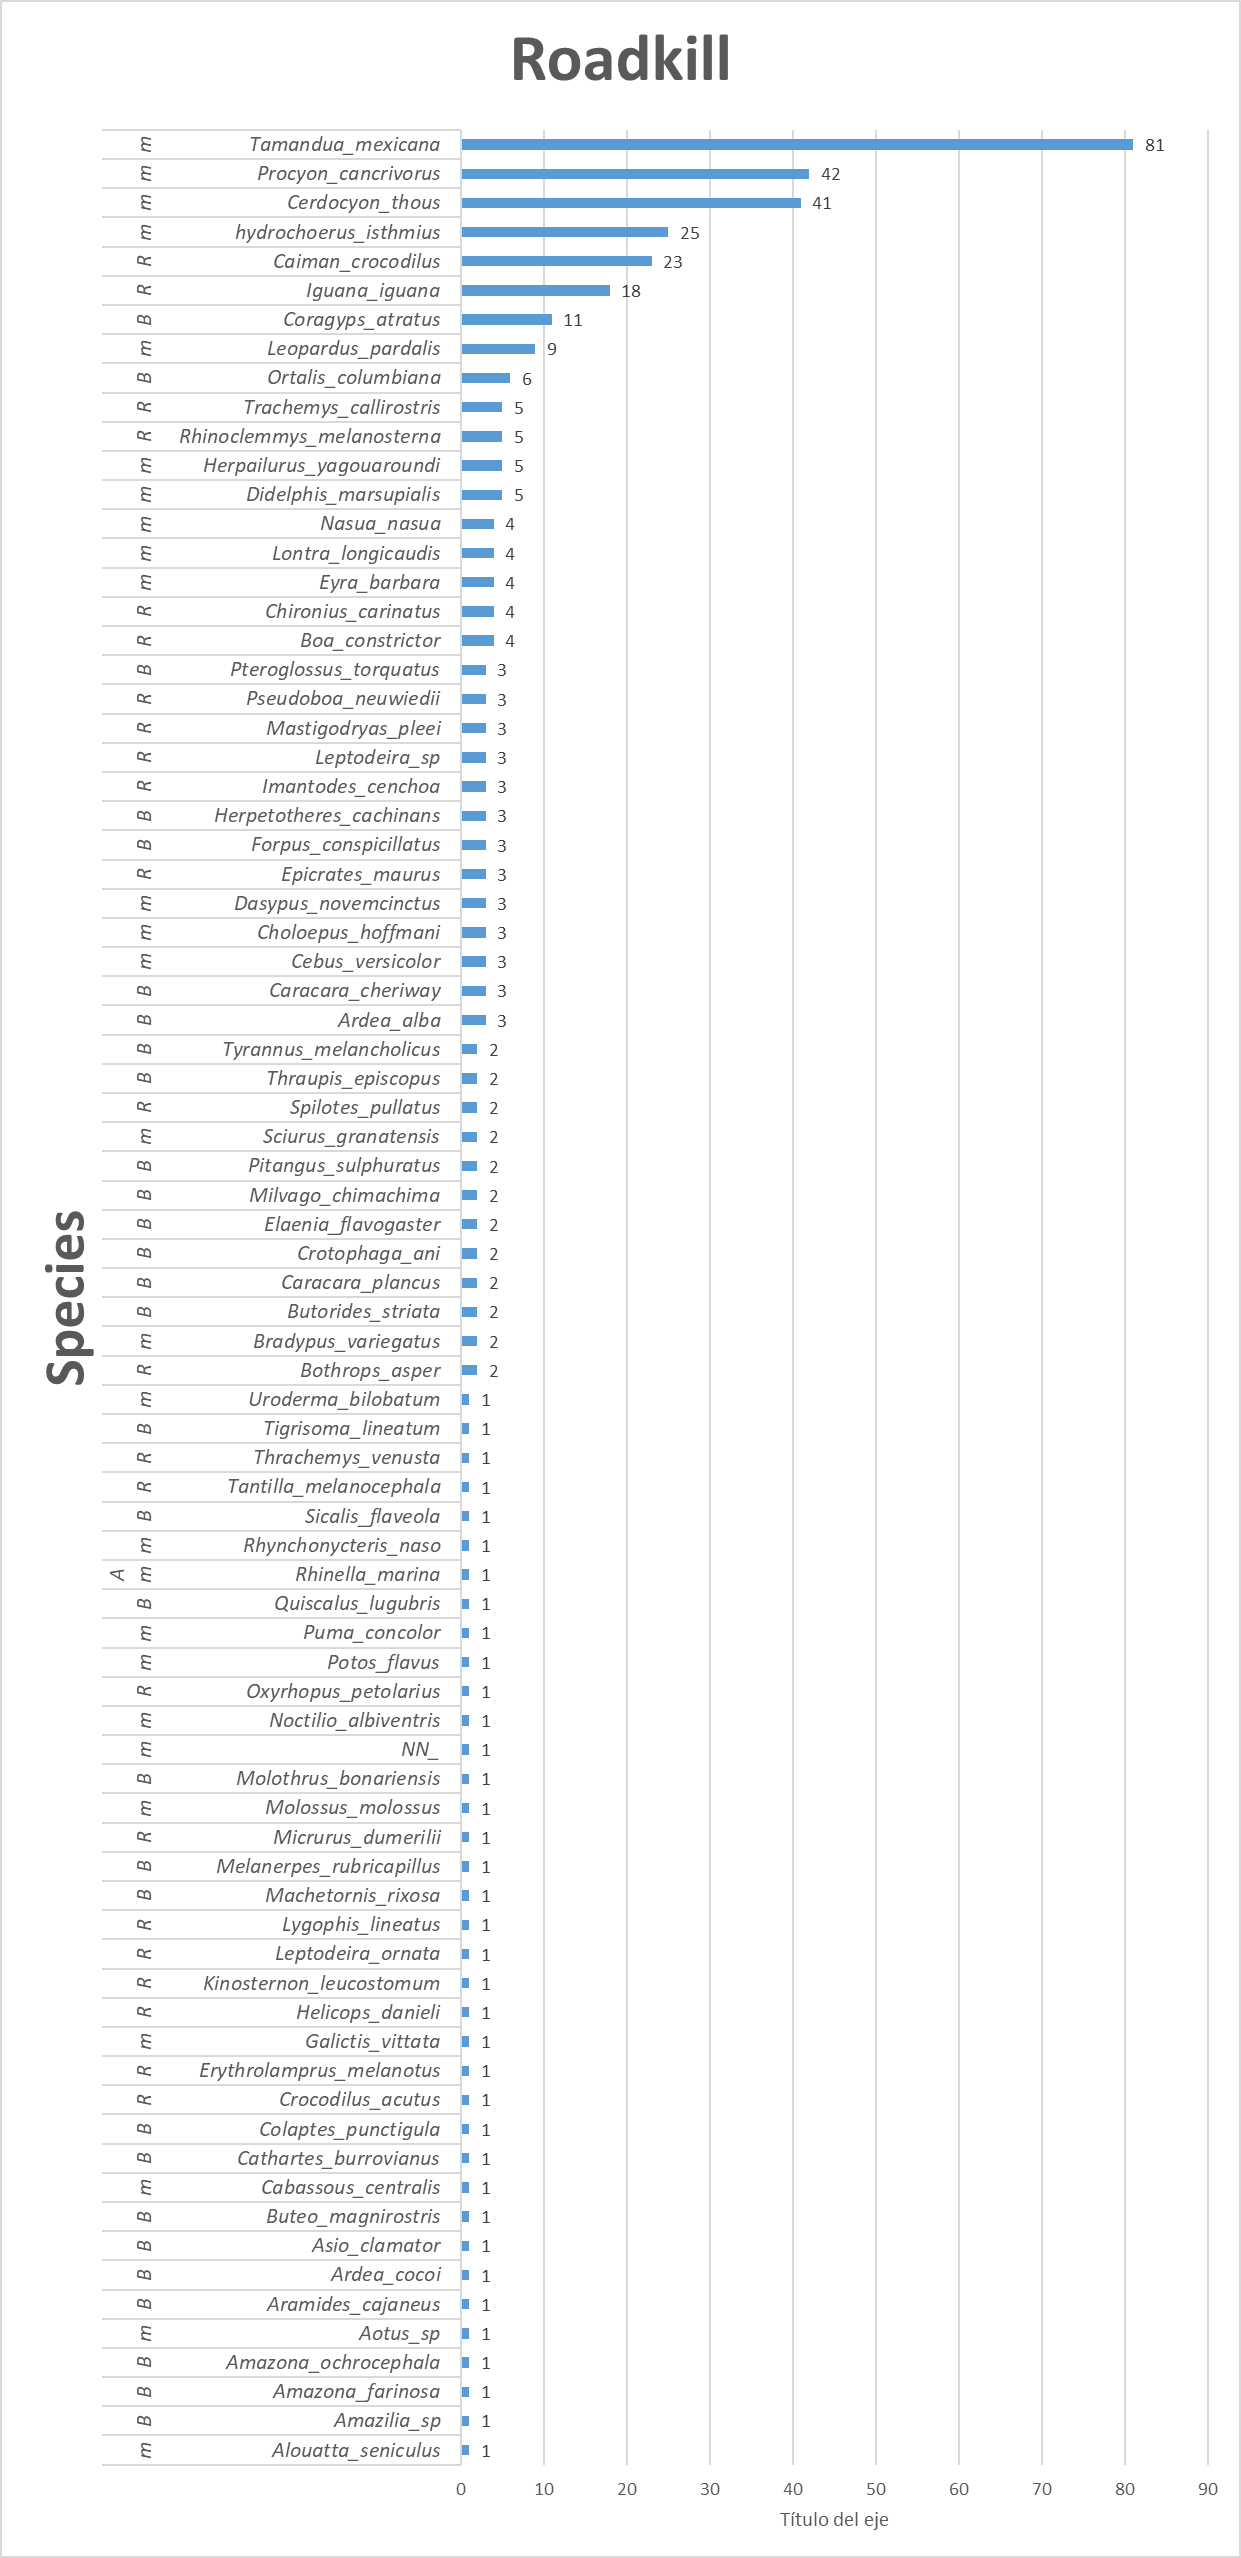
**

**Figure 1.** Summary of the roadkills by species


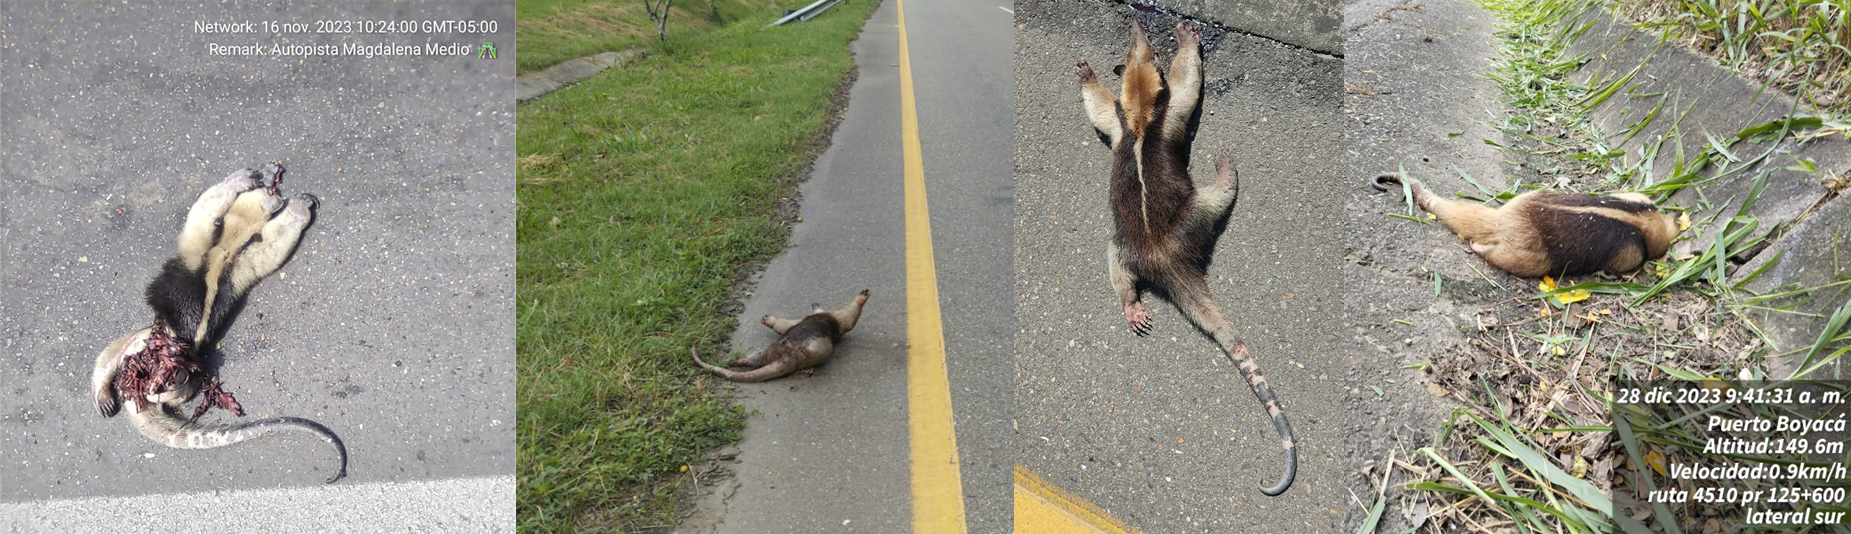


**Figure 2.** Photographic collage of *Tamandua mexicana* individuals recorded as roadkill


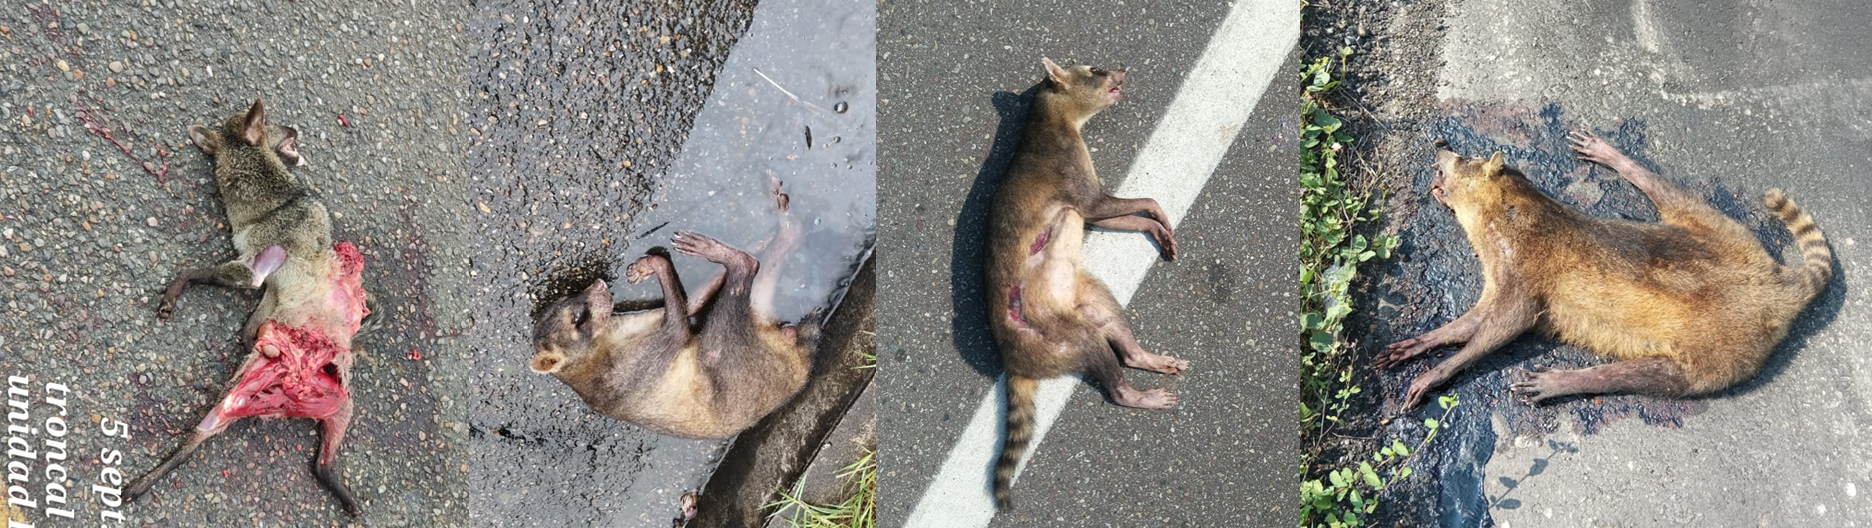


**Figure 3.** Photographic collage of *Procyon cancrivorus* individuals recorded as roadkill


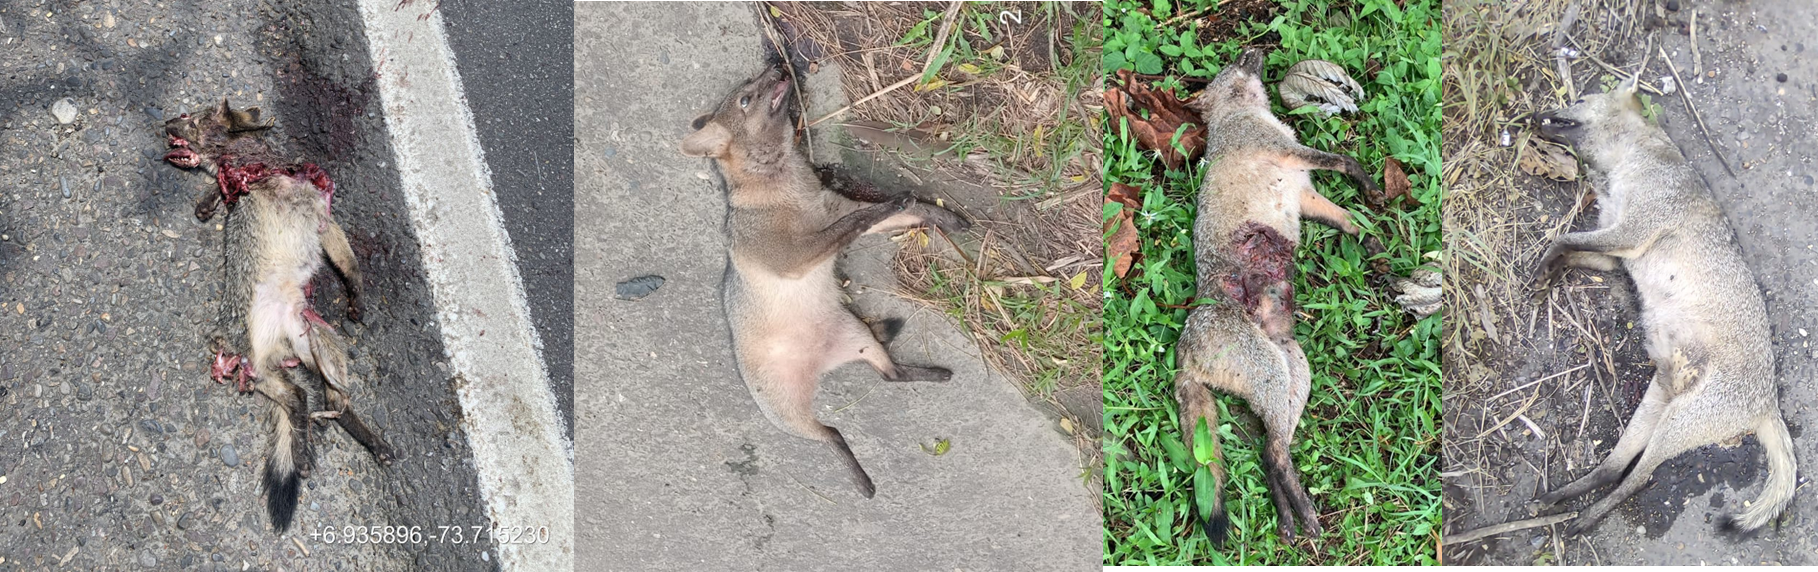


**Figure 4.** Photographic collage of *Cerdocyon thous* individuals recorded as roadkill


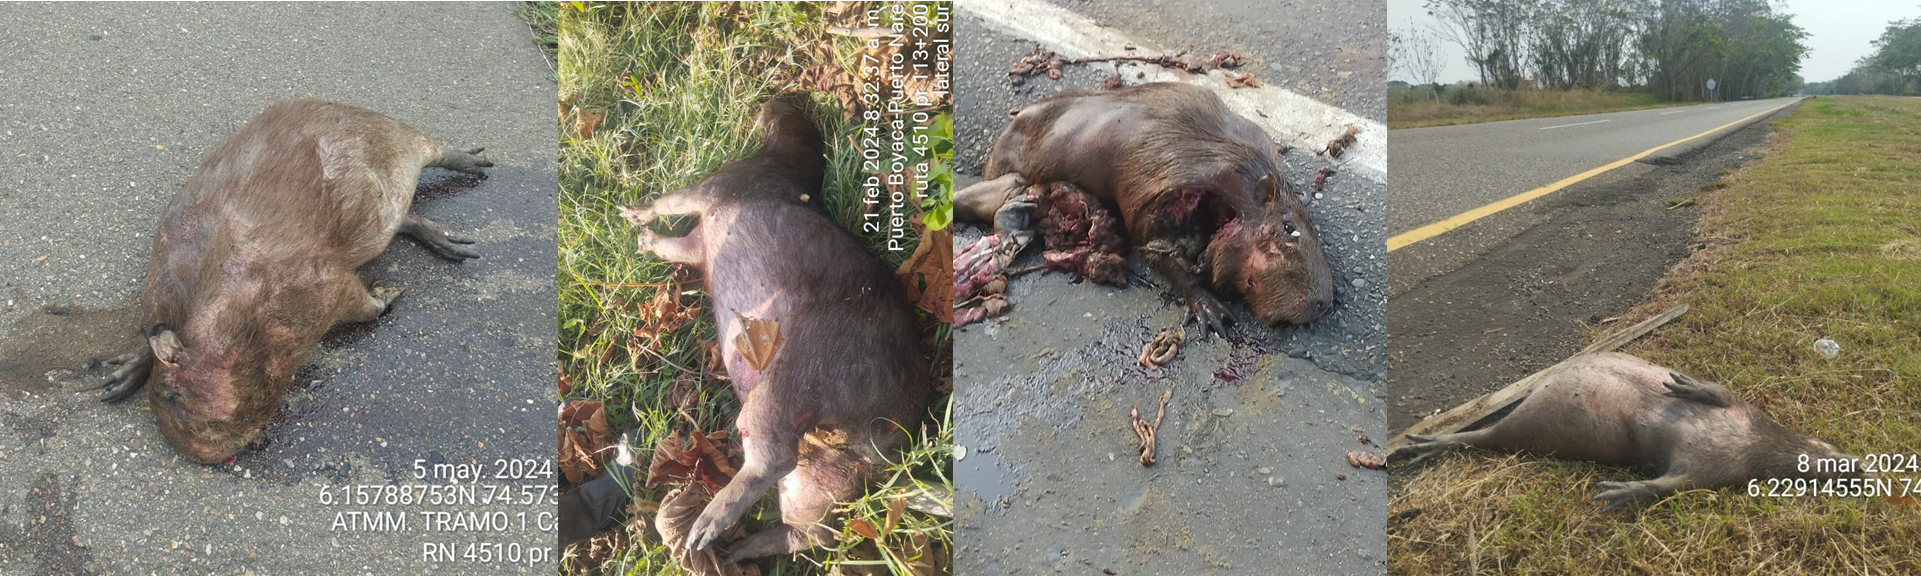


**Figure 5.** Photographic collage of *Hydrochoerus isthmius* individuals recorded as roadkill


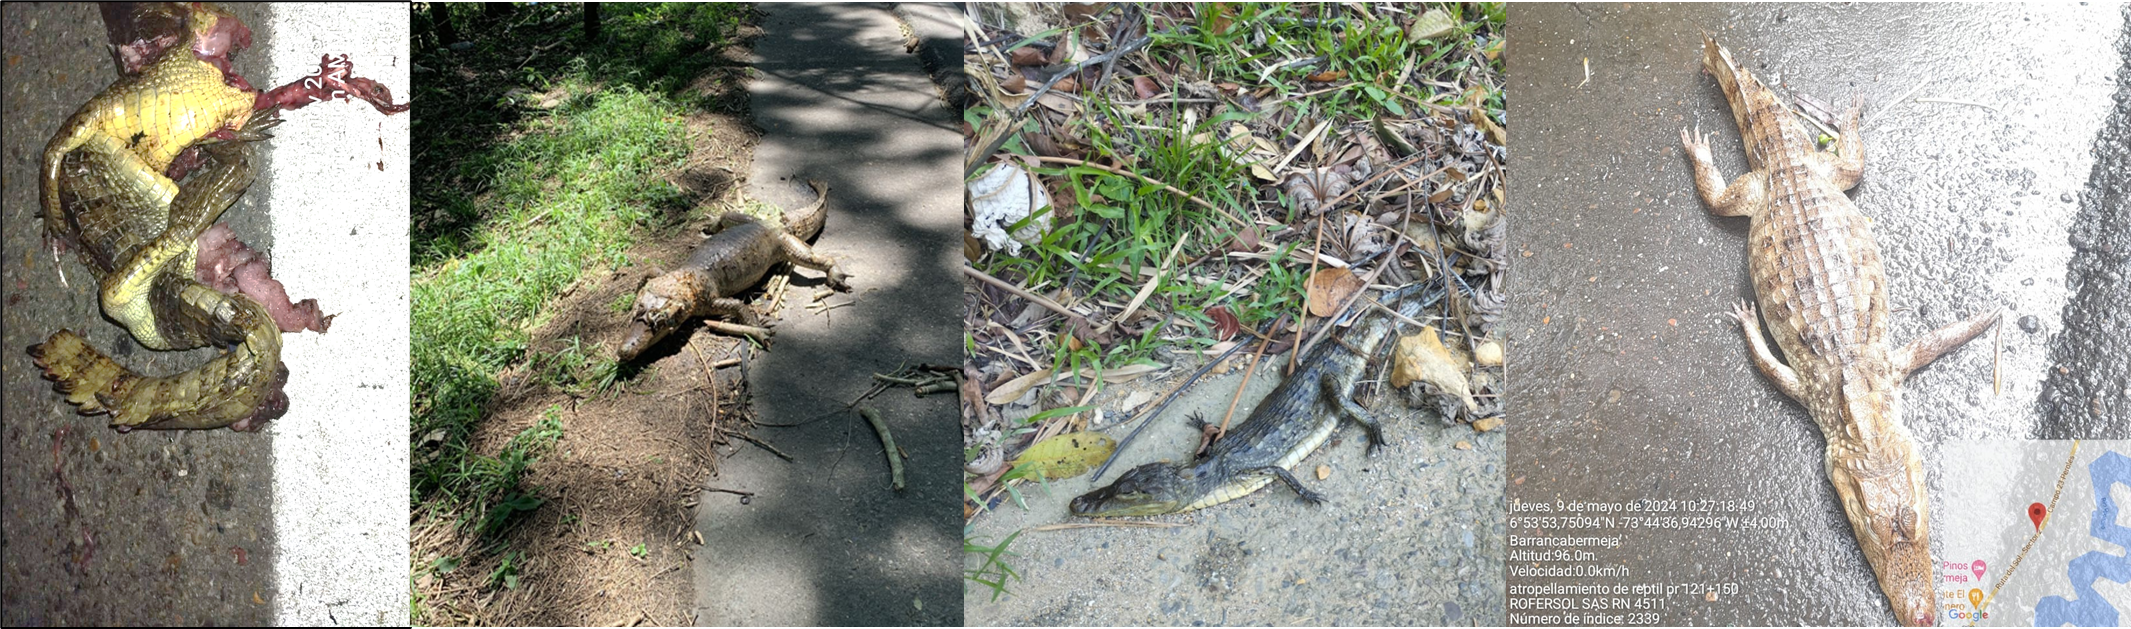


**Figure 6.** Photographic collage of *Caiman crocodilus* individuals recorded as roadkill


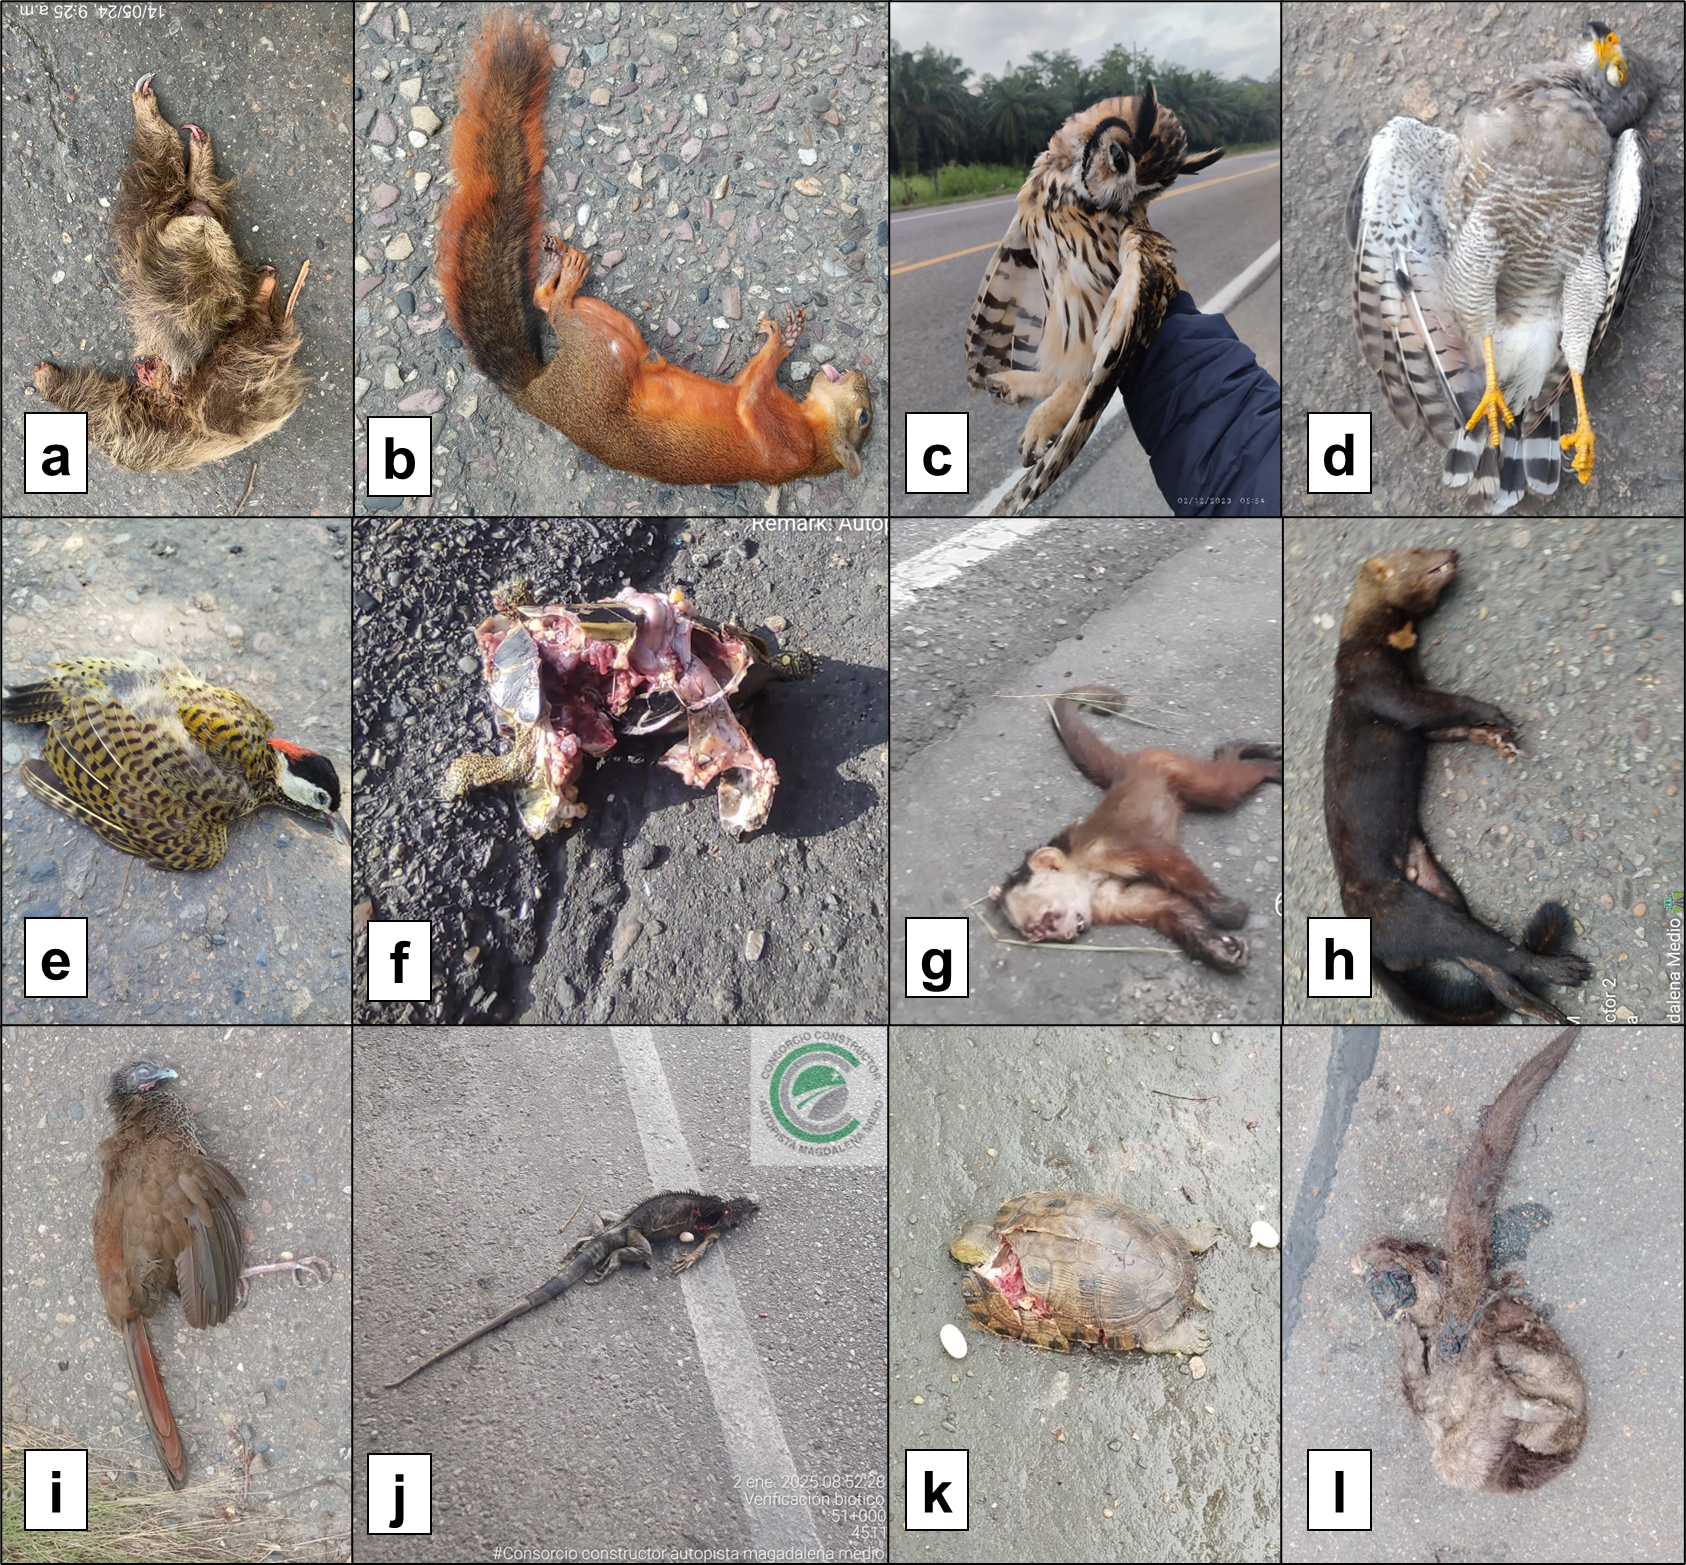


**Figure 6.** Photographic collage of different individuals recorded as roadkill. a = *choloepus hoffmanni*, b = *Sciurus granatensis*, c = *Asio clamator*, d = *Rupornis magnirostris*, e = *Colaptes punctigula*, f = *Rhinoclemmys melanosterna*, g = *Cebus versicolor*, h = *Eyra barbara*, i = *Ortalis Columbiana*, j = *Iguana iguana*, k = *Trachemys callirostris*, l = *Lontra longicaudis*.

**Table 1.** Extended information about roadkill surveys in the ruta de sol highway between 2022-2025. PK = point reference in the kilometer, RN = National route, X-Y geographical coordinates (GWS84)

| **DATE** | **CLASS** | **FAMILY** | **SPECIES** | **PK** | **NR** | **X** | **Y** |
| --- | --- | --- | --- | --- | --- | --- | --- |
| 21/12/2022 | Mammalia | Canidae | *Cerdocyon_thous* | 125+300 | 4510 | -73,5596 | 7,146918 |
| 17/01/2023 | Mammalia | Procyonidae | *Procyon_cancrivorus* | 65+000 | 4510 | -73,5662 | 7,12968 |
| 21/02/2023 | Mammalia | Myrmecophagidae | *Tamandua_mexicana* | 65+000 | 4510 | -73,5794 | 7,125981 |
| 28/02/2023 | Reptilia | Iguanidae | *Iguana_iguana* | 111+000 | 4510 | -73,5808 | 7,125317 |
| 6/03/2023 | Mammalia | Procyonidae | *Procyon_cancrivorus* | 91+000 | 4510 | -73,5808 | 7,125317 |
| 16/03/2023 | Mammalia | Myrmecophagidae | *Tamandua_mexicana* | 98+100 | 4510 | -73,5813 | 7,125218 |
| 18/03/2023 | Reptilia | Crocodylidae | *Caiman_crocodilus* | 103+000 | 4510 | -73,6401 | 7,076583 |
| 21/03/2023 | Mammalia | Myrmecophagidae | *Tamandua_mexicana* | 88+000 | 4510 | -73,6401 | 7,076583 |
| 22/03/2023 | Reptilia | Colubridae | *Pseudoboa_neuwiedii* | 65+920 | 4510 | -73,6401 | 7,076583 |
| 27/03/2023 | Mammalia | Myrmecophagidae | *Tamandua_mexicana* | 112+000 | 4510 | -73,6622 | 7,039397 |
| 27/03/2023 | Mammalia | Myrmecophagidae | *Tamandua_mexicana* | 97+300 | 4510 | -73,6941 | 6,983968 |
| 30/03/2023 | Mammalia | Procyonidae | *Procyon_cancrivorus* | 97+300 | 4510 | -73,6942 | 6,984401 |
| 8/04/2023 | Mammalia | Canidae | *Cerdocyon_thous* | 76+640 | 4510 | -73,6959 | 6,981797 |
| 12/04/2023 | Mammalia | Procyonidae | *Procyon_cancrivorus* | 67+000 | 4510 | -73,7008 | 6,965999 |
| 17/04/2023 | Mammalia | Mustelidae | *Eyra_barbara* | 43+700 | 4511 | -74,2461 | 6,474232 |
| 17/04/2023 | Mammalia | Myrmecophagidae | *Tamandua_mexicana* | 37+100 | 4513 | -73,7434 | 6,898474 |
| 20/04/2023 | Mammalia | Mustellidae | *Galictis_vittata* | 104+300 | 4510 | -73,7837 | 6,832486 |
| 21/04/2023 | Reptilia | Crocodylidae | *Caiman_crocodilus* | 62+500 | 4510 | -73,8355 | 6,764435 |
| 24/04/2023 | Mammalia | Procyonidae | *Nasua_nasua* | 44+950 | 4510 | -73,8355 | 6,764435 |
| 25/04/2023 | Reptilia | Crocodylidae | *Caiman_crocodilus* | 105+900 | 4510 | -73,8801 | 6,715984 |
| 26/04/2023 | Reptilia | Colubridae | *Chironius_carinatus* | 52+300 | 4510 | -73,8839 | 6,708932 |
| 26/04/2023 | Mammalia | Procyonidae | *Procyon_cancrivorus* | 86+900 | 4510 | -73,8839 | 6,708932 |
| 28/04/2023 | Mammalia | Myrmecophagidae | *Tamandua_mexicana* | 4+250 | 4511 | -73,8839 | 6,708932 |
| 2/05/2023 | Reptilia | Crocodylidae | *Caiman_crocodilus* | 111+080 | 4510 | -73,8919 | 6,697207 |
| 2/05/2023 | Mammalia | Procyonidae | *Procyon_cancrivorus* | 50+250 | 4510 | -73,8979 | 6,694598 |
| 4/05/2023 | Mammalia | Procyonidae | *Procyon_cancrivorus* | 88+700 | 4510 | -73,9178 | 6,67801 |
| 5/05/2023 | Mammalia | Canidae | *Cerdocyon_thous* | 39+200 | 4510 | -73,9398 | 6,658186 |
| 8/05/2023 | Reptilia | Crocodylidae | *Crocodilus_acutus* | 37+240 | 4510 | -74,0721 | 6,533019 |
| 9/05/2023 | Reptilia | Colubridae | *Leptodeira_sp* | 110+040 | 4510 | -74,0774 | 6,527755 |
| 9/05/2023 | Mammalia | Procyonidae | *Procyon_cancrivorus* | 95+300 | 4510 | -74,0774 | 6,527755 |
| 12/05/2023 | Mammalia | Canidae | *Cerdocyon_thous* | 120+100 | 4510 | -74,1067 | 6,518485 |
| 13/05/2023 | Mammalia | Procyonidae | *Procyon_cancrivorus* | 30+500 | 4510 | -74,144 | 6,503903 |
| 15/05/2023 | Mammalia | Procyonidae | *Procyon_cancrivorus* | 41+050 | 4511 | -74,144 | 6,503903 |
| 16/05/2023 | Reptilia | Crocodylidae | *Caiman_crocodilus* | 92+000 | 4511 | -74,144 | 6,503903 |
| 23/05/2023 | Reptilia | Colubridae | *Pseudoboa_neuwiedii* | 102+800 | 4510 | -74,2559 | 6,478002 |
| 27/05/2023 | Aves | Psittacidae | *Forpus_conspicillatus* | 20+500 | 4511 | -74,3742 | 6,385392 |
| 27/05/2023 | Mammalia | Caviidae | *hydrochoerus_isthmius* | 9+950 | 4511 | -74,3818 | 6,381832 |
| 27/05/2023 | Reptilia | Kinosternidae | *Kinosternon_leucostomum* | 16+800 | 4511 | -74,3844 | 6,381113 |
| 27/05/2023 | Mammalia | Procyonidae | *Procyon_cancrivorus* | 20+500 | 4511 | -74,3904 | 6,379448 |
| 6/06/2023 | Mammalia | Myrmecophagidae | *Tamandua_mexicana* | 4+100 | 4511 | -74,4072 | 6,374418 |
| 6/06/2023 | Mammalia | Myrmecophagidae | *Tamandua_mexicana* | 6+000 | 4513 | -74,466 | 6,282258 |
| 7/06/2023 | Reptilia | Iguanidae | *Iguana_iguana* | 98+100 | 4510 | -74,4438 | 6,31393 |
| 7/06/2023 | Mammalia | Procyonidae | *Procyon_cancrivorus* | 98+000 | 4510 | -74,4265 | 6,354073 |
| 7/06/2023 | Reptilia | Geoemydidae | *Rhinoclemmys_melanosterna* | 03+050 | 4511 | -74,466 | 6,282258 |
| 9/06/2023 | Aves | Ardeidae | *Butorides_striata* | 22+800 | 4511 | -74,4674 | 6,281559 |
| 9/06/2023 | Reptilia | Colubridae | *Chironius_carinatus* | 85+000 | 4510 | -74,4488 | 6,304988 |
| 9/06/2023 | Reptilia | Geoemydidae | *Rhinoclemmys_melanosterna* | 128+300 | 4510 | -74,4674 | 6,281559 |
| 14/06/2023 | Mammalia | Procyonidae | *Potos_flavus* | 96+700 | 4510 | -74,4536 | 6,299078 |
| 16/06/2023 | Reptilia | Crocodylidae | *Caiman_crocodilus* | 38+700 | 4511 | -74,4555 | 6,296481 |
| 16/06/2023 | Mammalia | Mustelidae | *Eyra_barbara* | 120+800 | 4510 | -74,475 | 6,270846 |
| 16/06/2023 | Mammalia | Myrmecophagidae | *Tamandua_mexicana* | 128+300 | 4510 | -74,4646 | 6,283691 |
| 18/06/2023 | Mammalia | Myrmecophagidae | *Tamandua_mexicana* | 121+900 | 4510 | -74,4765 | 6,269431 |
| 19/06/2023 | Mammalia | Felidae | *Leopardus_pardalis* | 79+100 | 4510 | -74,4881 | 6,260016 |
| 20/06/2023 | Mammalia | Canidae | *Cerdocyon_thous* | 96+740 | 4510 | -74,4871 | 6,260855 |
| 20/06/2023 | Aves | Psittacidae | *Forpus_conspicillatus* | 132+000 | 4511 | -74,4987 | 6,250595 |
| 20/06/2023 | Mammalia | Procyonidae | *Procyon_cancrivorus* | 39+500 | 4510 | -74,4951 | 6,254281 |
| 20/06/2023 | Mammalia | Myrmecophagidae | *Tamandua_mexicana* | 51+200 | 4510 | -74,4987 | 6,250595 |
| 21/06/2023 | Reptilia | Colubridae | *Leptodeira_sp* | 134+080 | 4510 | -74,5438 | 6,029539 |
| 21/06/2023 | Aves | Cracidae | *Ortalis_columbiana* | 123+800 | 4510 | -74,5465 | 6,023883 |
| 21/06/2023 | Aves | Ramphastidae | *Pteroglossus_torquatus* | 124+800 | 4510 | -74,5199 | 6,234485 |
| 22/06/2023 | Aves | Ramphastidae | *Pteroglossus_torquatus* | 111+400 | 4510 | -74,5467 | 6,023904 |
| 30/06/2023 | Aves | Ardeidae | *Ardea_cocoi* | 20+400 | 4511 | -74,5467 | 6,023979 |
| 4/07/2023 | Mammalia | Myrmecophagidae | *Tamandua_mexicana* | 90+000 | 4510 | -74,5498 | 6,044485 |
| 7/07/2023 | Aves | Cracidae | *Ortalis_columbiana* | 69+620 | 4510 | -74,5536 | 6,099102 |
| 7/07/2023 | Aves | Ramphastidae | *Pteroglossus_torquatus* | 95+780 | 4510 | -74,5539 | 6,024278 |
| 7/07/2023 | Mammalia | Myrmecophagidae | *Tamandua_mexicana* | 8+200 | 4513 | -74,5561 | 6,140568 |
| 10/07/2023 | Reptilia | Colubridae | *Pseudoboa_neuwiedii* | 70+520 | 4510 | -74,557 | 6,205586 |
| 11/07/2023 | Mammalia | Procyonidae | *Procyon_cancrivorus* | 111+900 | 4511 | -74,557 | 6,205564 |
| 12/07/2023 | Mammalia | Myrmecophagidae | *Tamandua_mexicana* | 122+200 | 4510 | -74,5567 | 6,066377 |
| 14/07/2023 | Aves | Falconidae | *Caracara_cheriway* | 105+100 | 4510 | -74,5571 | 6,065762 |
| 14/07/2023 | Mammalia | NN | *NN_* | 105+100 | 4510 | -74,5574 | 6,065052 |
| 14/07/2023 | Mammalia | Procyonidae | *Procyon_cancrivorus* | 105+100 | 4510 | -74,5574 | 6,06501 |
| 17/07/2023 | Mammalia | Myrmecophagidae | *Tamandua_mexicana* | 92+600 | 4511 | -74,5578 | 6,143524 |
| 18/07/2023 | Mammalia | Procyonidae | *Procyon_cancrivorus* | 75+700 | 4510 | -74,5579 | 6,143757 |
| 19/07/2023 | Mammalia | Canidae | *Cerdocyon_thous* | 6+000 | 4511 | -74,5598 | 5,979397 |
| 19/07/2023 | Reptilia | Iguanidae | *Iguana_iguana* | 97+300 | 4510 | -74,5588 | 6,144804 |
| 19/07/2023 | Mammalia | Mustelidae | *Lontra_longicaudis* | 5+700 | 4511 | -74,5593 | 6,145241 |
| 21/07/2023 | Reptilia | Viperidae | *Bothrosp_asper* | 85+730 | 4511 | -74,5599 | 6,012116 |
| 21/07/2023 | Mammalia | Canidae | *Cerdocyon_thous* | 115+000 | 4510 | -74,5608 | 5,977819 |
| 21/07/2023 | Reptilia | Colubridae | *Chironius_carinatus* | 100+780 | 4511 | -74,5598 | 5,979371 |
| 21/07/2023 | Mammalia | Myrmecophagidae | *Tamandua_mexicana* | 122+700 | 4510 | -74,5609 | 6,056687 |
| 24/07/2023 | Mammalia | Myrmecophagidae | *Tamandua_mexicana* | 91+500 | 4510 | -74,5614 | 6,015445 |
| 25/07/2023 | Mammalia | Myrmecophagidae | *Tamandua_mexicana* | 132+500 | 4511 | -74,5628 | 5,910425 |
| 27/07/2023 | Aves | Psittacidae | *Forpus_conspicillatus* | 130+900 | 4510 | -74,5652 | 5,973035 |
| 27/07/2023 | Reptilia | Iguanidae | *Iguana_iguana* | 131+000 | 4510 | -74,5637 | 6,181082 |
| 1/08/2023 | Mammalia | Canidae | *Cerdocyon_thous* | 112+400 | 4511 | -74,5653 | 5,918656 |
| 4/08/2023 | Reptilia | Iguanidae | *Iguana_iguana* | 107+600 | 4511 | -74,5656 | 5,97256 |
| 5/08/2023 | Mammalia | Caviidae | *hydrochoerus_isthmius* | 128+200 | 4510 | -74,5659 | 5,954712 |
| 5/08/2023 | Mammalia | Caviidae | *hydrochoerus_isthmius* | 128+200 | 4510 | -74,5658 | 5,868598 |
| 5/08/2023 | Mammalia | Caviidae | *hydrochoerus_isthmius* | 128+200 | 4510 | -74,5662 | 5,967433 |
| 8/08/2023 | Mammalia | Procyonidae | *Procyon_cancrivorus* | 68+920 | 4510 | -74,5668 | 6,175814 |
| 14/08/2023 | Mammalia | Caviidae | *hydrochoerus_isthmius* | 39+500 | 4511 | -74,5671 | 5,930729 |
| 14/08/2023 | Mammalia | Procyonidae | *Procyon_cancrivorus* | 26+800 | 4511 | -74,5665 | 5,968773 |
| 17/08/2023 | Reptilia | Boidae | *Boa_constrictor* | 112+000 | 4510 | -74,5672 | 5,871012 |
| 18/08/2023 | Mammalia | Choloepodidae | *Choloepus_hoffmani* | 97+900 | 4511 | -74,5673 | 5,898324 |
| 22/08/2023 | Mammalia | Canidae | *Cerdocyon_thous* | 90+000 | 4510 | -74,5676 | 5,923337 |
| 23/08/2023 | Mammalia | Myrmecophagidae | *Tamandua_mexicana* | 4+200 | 4511 | -74,5686 | 5,945788 |
| 24/08/2023 | Aves | Psittacidae | *Amazona_ochrocephala* | 115+500 | 4510 | -74,5685 | 5,88164 |
| 24/08/2023 | Mammalia | Dasypodidae | *Dasypus_novemcinctus* | 146+000 | 4511 | -74,5688 | 5,931799 |
| 25/08/2023 | Aves | Cuculidae | *Crotophaga_ani* | 101+600 | 4510 | -74,5688 | 5,893924 |
| 25/08/2023 | Mammalia | Myrmecophagidae | *Tamandua_mexicana* | 104+100 | 4510 | -74,569 | 5,931971 |
| 28/08/2023 | Reptilia | Colubridae | *Imantodes_cenchoa* | 105+600 | 4510 | -74,569 | 5,932137 |
| 28/08/2023 | Mammalia | Myrmecophagidae | *Tamandua_mexicana* | 64+800 | 4511 | -74,569 | 5,932184 |
| 29/08/2023 | Mammalia | Procyonidae | *Procyon_cancrivorus* | 120+560 | 4510 | -74,5694 | 5,942152 |
| 30/08/2023 | Reptilia | Colubridae | *Spilotes_pullatus* | 143+100 | 4511 | -74,5694 | 5,942152 |
| 31/08/2023 | Reptilia | Crocodylidae | *Caiman_crocodilus* | 130+260 | 4511 | -74,5703 | 6,168416 |
| 1/09/2023 | Aves | Falconidae | *Herpetotheres_cachinans* | 92+900 | 4511 | -74,5735 | 6,158774 |
| 1/09/2023 | Aves | Falconidae | *Milvago_chimachima* | 112+100 | 4510 | -74,5728 | 6,154126 |
| 1/09/2023 | Mammalia | Myrmecophagidae | *Tamandua_mexicana* | 143+700 | 4511 | -74,578 | 5,83823 |
| 2/09/2023 | Mammalia | Bradipodidae | *Bradypus_variegatus* | 115+00 | 4510 | -74,5867 | 5,819828 |
| 2/09/2023 | Mammalia | Cebidae | *Cebus_versicolor* | 146+000 | 4511 | -74,5937 | 5,809148 |
| 2/09/2023 | Reptilia | Colubridae | *Oxyrhopus_petolarius* | 3+000 | 4511 | -74,5895 | 5,816821 |
| 2/09/2023 | Mammalia | Procyonidae | *Procyon_cancrivorus* | 114+200 | 4510 | -74,5851 | 5,82832 |
| 7/09/2023 | Mammalia | Myrmecophagidae | *Tamandua_mexicana* | 21+200 | 4511 | -74,5959 | 5,801642 |
| 8/09/2023 | Mammalia | Caviidae | *hydrochoerus_isthmius* | 44+250 | 4511 | -74,619 | 5,629457 |
| 8/09/2023 | Mammalia | Myrmecophagidae | *Tamandua_mexicana* | 62+250 | 4511 | -74,6172 | 5,704535 |
| 11/09/2023 | Mammalia | Myrmecophagidae | *Tamandua_mexicana* | 61+600 | 4511 | -74,6208 | 5,614196 |
| 12/09/2023 | Reptilia | Crocodylidae | *Caiman_crocodilus* | 115+950 | 4510 | -74,6215 | 5,604315 |
| 12/09/2023 | Mammalia | Canidae | *Cerdocyon_thous* | 101+500 | 4510 | -74,623 | 5,726149 |
| 12/09/2023 | Aves | Tyrannidae | *Machetornis_rixosa* | 97+000 | 4510 | -74,6219 | 5,595688 |
| 13/09/2023 | Mammalia | Myrmecophagidae | *Tamandua_mexicana* | 80+000 | 4510 | -74,623 | 5,726193 |
| 15/09/2023 | Mammalia | Canidae | *Cerdocyon_thous* | 107+540 | 4510 | -74,6235 | 5,768806 |
| 15/09/2023 | Mammalia | Canidae | *Cerdocyon_thous* | 107+700 | 4510 | -74,623 | 5,583617 |
| 15/09/2023 | Mammalia | Dasypodidae | *Dasypus_novemcinctus* | 72+000 | 4510 | -74,6236 | 5,734504 |
| 16/09/2023 | Aves | Psittacidae | *Amazona_farinosa* | 93+700 | 4510 | -74,6259 | 5,743903 |
| 16/09/2023 | Reptilia | Crocodylidae | *Caiman_crocodilus* | 92+200 | 4510 | -74,6259 | 5,743906 |
| 16/09/2023 | Mammalia | Myrmecophagidae | *Tamandua_mexicana* | 92+900 | 4510 | -74,6269 | 5,748308 |
| 16/09/2023 | Mammalia | Myrmecophagidae | *Tamandua_mexicana* | 110+900 | 4510 | -74,6266 | 5,548111 |
| 17/09/2023 | Reptilia | Crocodylidae | *Caiman_crocodilus* | 28+950 | 4511 | -74,6302 | 5,764295 |
| 18/09/2023 | Mammalia | Myrmecophagidae | *Tamandua_mexicana* | 143+100 | 4511 | -74,6301 | 5,532521 |
| 19/09/2023 | Mammalia | Aotidae | *Aotus_sp* | 72+700 | 4511 | -74,635 | 5,523978 |
| 19/09/2023 | Mammalia | Didelphidae | *Didelphis_marsupialis* | 101+450 | 4511 | -74,635 | 5,523978 |
| 21/09/2023 | Aves | Cathartidae | *Coragyps_atratus* | 102+700 | 4510 | -74,6354 | 5,519463 |
| 21/09/2023 | Mammalia | Procyonidae | *Procyon_cancrivorus* | 107+750 | 4510 | -74,6351 | 5,523915 |
| 22/09/2023 | Aves | Tyrannidae | *Elaenia_flavogaster* | 106+000 | 4510 | -74,6378 | 5,499176 |
| 26/09/2023 | Mammalia | Canidae | *Cerdocyon_thous* | 140+050 | 4511 | -74,6385 | 5,50179 |
| 27/09/2023 | Mammalia | Felidae | *Leopardus_pardalis* | 22+100 | 4511 | -74,6424 | 5,482914 |
| 27/09/2023 | Reptilia | Emydidae | *Thrachemys_venusta* | 122+250 | 4511 | -73,5804 | 7,126014 |
| 28/09/2023 | Mammalia | Canidae | *Cerdocyon_thous* | 26+500 | 4511 | -73,5808 | 7,125317 |
| 28/09/2023 | Mammalia | Mustelidae | *Lontra_longicaudis* | 133+750 | 4511 | -73,5803 | 7,12568 |
| 3/10/2023 | Mammalia | Canidae | *Cerdocyon_thous* | 114+700 | 4510 | -73,6159 | 7,117881 |
| 5/10/2023 | Reptilia | Colubridae | *Erythrolamprus_melanotus* | 89+200 | 4510 | -73,6221 | 7,106739 |
| 9/10/2023 | Mammalia | Canidae | *Cerdocyon_thous* | 94+300 | 4510 | -73,6257 | 7,099513 |
| 9/10/2023 | Mammalia | Caviidae | *hydrochoerus_isthmius* | 36+600 | 4511 | -73,6315 | 7,091462 |
| 9/10/2023 | Mammalia | Procyonidae | *Procyon_cancrivorus* | 78+900 | 4510 | -73,6287 | 7,095174 |
| 9/10/2023 | Mammalia | Myrmecophagidae | *Tamandua_mexicana* | 35+100 | 4511 | -73,625 | 7,100906 |
| 10/10/2023 | Reptilia | Crocodylidae | *Caiman_crocodilus* | 35+100 | 4511 | -73,6322 | 7,089894 |
| 10/10/2023 | Reptilia | Boidae | *Epicrates_maurus* | 24+300 | 4511 | -73,642 | 7,073548 |
| 10/10/2023 | Reptilia | Colubridae | *Imantodes_cenchoa* | 82+900 | 4511 | -73,6323 | 7,089732 |
| 11/10/2023 | Mammalia | Canidae | *Cerdocyon_thous* | 38+920 | 4511 | -73,6446 | 7,068775 |
| 12/10/2023 | Reptilia | Crocodylidae | *Caiman_crocodilus* | 75+900 | 4510 | -73,6446 | 7,068775 |
| 13/10/2023 | Mammalia | Myrmecophagidae | *Tamandua_mexicana* | 101+100 | 4510 | -73,6445 | 7,068747 |
| 17/10/2023 | Aves | Falconidae | *Herpetotheres_cachinans* | 48+500 | 4511 | -73,6524 | 7,055531 |
| 17/10/2023 | Mammalia | Mustelidae | *Lontra_longicaudis* | 126+830 | 4510 | -73,6532 | 7,054546 |
| 17/10/2023 | Mammalia | Myrmecophagidae | *Tamandua_mexicana* | 30+500 | 4511 | -73,6511 | 7,057783 |
| 21/10/2023 | Mammalia | Procyonidae | *Procyon_cancrivorus* | 84+000 | 4510 | -73,6532 | 7,054262 |
| 23/10/2023 | Mammalia | Felidae | *Herpailurus_yagouaroundi* | 133+580 | 4510 | -73,659 | 7,045297 |
| 26/10/2023 | Mammalia | Canidae | *Cerdocyon_thous* | 59+300 | 4510 | -73,6642 | 7,036425 |
| 31/10/2023 | Aves | Cracidae | *Ortalis_columbiana* | 103+800 | 4510 | -73,6684 | 7,027967 |
| 2/11/2023 | Mammalia | Canidae | *Cerdocyon_thous* | 31+300 | 4511 | -73,6855 | 6,99928 |
| 10/11/2023 | Mammalia | Caviidae | *hydrochoerus_isthmius* | 4+500 | 4511 | -73,6877 | 6,996069 |
| 10/11/2023 | Mammalia | Procyonidae | *Nasua_nasua* | 96+000 | 4510 | -73,689 | 6,993521 |
| 11/11/2023 | Aves | Ardeidae | *Butorides_striata* | 110+200 | 4510 | -73,6942 | 6,983983 |
| 13/11/2023 | Reptilia | Crocodylidae | *Caiman_crocodilus* | 20+500 | 4511 | -73,7004 | 6,967547 |
| 13/11/2023 | Aves | Cathartidae | *Cathartes_burrovianus* | 28+500 | 4511 | -73,6958 | 6,981785 |
| 13/11/2023 | Mammalia | Caviidae | *hydrochoerus_isthmius* | 9+500 | 4511 | -73,6989 | 6,976756 |
| 13/11/2023 | Reptilia | Iguanidae | *Iguana_iguana* | 109+200 | 4510 | -73,6952 | 6,982646 |
| 13/11/2023 | Mammalia | Myrmecophagidae | *Tamandua_mexicana* | 26+500 | 4511 | -73,6958 | 6,981878 |
| 14/11/2023 | Reptilia | Colubridae | *Mastigodryas_pleei* | 93+870 | 4510 | -73,7041 | 6,956473 |
| 16/11/2023 | Aves | Cathartidae | *Coragyps_atratus* | 119+700 | 4510 | -73,7223 | 6,927633 |
| 16/11/2023 | Mammalia | Procyonidae | *Procyon_cancrivorus* | 2+500 | 4511 | -73,7191 | 6,931854 |
| 16/11/2023 | Mammalia | Myrmecophagidae | *Tamandua_mexicana* | 65+500 | 4511 | -73,7195 | 6,93125 |
| 16/11/2023 | Mammalia | Myrmecophagidae | *Tamandua_mexicana* | 84+800 | 4510 | -73,7228 | 6,926893 |
| 16/11/2023 | Mammalia | Myrmecophagidae | *Tamandua_mexicana* | 41+500 | 4510 | -73,7228 | 6,926893 |
| 20/11/2023 | Mammalia | Canidae | *Cerdocyon_thous* | 80+400 | 4511 | -73,7354 | 6,911023 |
| 20/11/2023 | Mammalia | Myrmecophagidae | *Tamandua_mexicana* | 23+900 | 4511 | -73,7376 | 6,908204 |
| 21/11/2023 | Reptilia | Colubridae | *Chironius_carinatus* | 132+000 | 4511 | -73,7416 | 6,90302 |
| 21/11/2023 | Reptilia | Colubridae | *Helicops_danieli* | 94+050 | 4511 | -73,7412 | 6,903731 |
| 1/12/2023 | Mammalia | Myrmecophagidae | *Tamandua_mexicana* | 102+500 | 4510 | -73,7693 | 6,856122 |
| 2/12/2023 | Aves | Strigidae | *Asio_clamator* | 102+500 | 4511 | -73,7721 | 6,851264 |
| 2/12/2023 | Reptilia | Iguanidae | *Iguana_iguana* | 102+500 | 4511 | -73,7802 | 6,838229 |
| 4/12/2023 | Mammalia | Myrmecophagidae | *Tamandua_mexicana* | 120+940 | 4511 | -73,7882 | 6,824897 |
| 18/12/2023 | Mammalia | Bradypodidae | *Bradypus_variegatus* | 132+000 | 4511 | -73,8002 | 6,80347 |
| 18/12/2023 | Mammalia | Canidae | *Cerdocyon_thous* | 23+000 | 4511 | -73,8196 | 6,780648 |
| 18/12/2023 | Reptilia | Iguanidae | *Iguana_iguana* | 102+500 | 4511 | -73,7911 | 6,818956 |
| 18/12/2023 | Reptilia | Iguanidae | *Iguana_iguana* | 120+490 | 4510 | -73,8 | 6,803749 |
| 18/12/2023 | Reptilia | Iguanidae | *Iguana_iguana* | 77+600 | 4510 | -73,8294 | 6,770283 |
| 18/12/2023 | Reptilia | Colubridae | *Lygophis_lineatus* | 7+850 | 4511 | -73,8284 | 6,771723 |
| 18/12/2023 | Mammalia | Myrmecophagidae | *Tamandua_mexicana* | 22+000 | 4511 | -73,8276 | 6,772222 |
| 19/12/2023 | Mammalia | Choloepodidae | *Choloepus_hoffmani* | 89+000 | 4511 | -73,8387 | 6,761112 |
| 19/12/2023 | Aves | Cathartidae | *Coragyps_atratus* | 44+700 | 4511 | -73,8354 | 6,764452 |
| 19/12/2023 | Mammalia | Didelphidae | *Didelphis_marsupialis* | 139+400 | 4511 | -73,8413 | 6,757736 |
| 19/12/2023 | Reptilia | Iguanidae | *Iguana_iguana* | 64+600 | 4511 | -73,8383 | 6,761789 |
| 19/12/2023 | Reptilia | Colubridae | *Leptodeira_sp* | 64+600 | 4511 | -73,8387 | 6,761112 |
| 20/12/2023 | Mammalia | Caviidae | *hydrochoerus_isthmius* | 112+200 | 4511 | -73,8445 | 6,754256 |
| 24/12/2023 | Mammalia | Felidae | *Leopardus_pardalis* | 23+600 | 4511 | -73,8715 | 6,743528 |
| 28/12/2023 | Mammalia | Canidae | *Cerdocyon_thous* | 80+000 | 4511 | -73,8565 | 6,742833 |
| 28/12/2023 | Mammalia | Caviidae | *hydrochoerus_isthmius* | 38+000 | 4511 | -73,8715 | 6,743528 |
| 28/12/2023 | Mammalia | Myrmecophagidae | *Tamandua_mexicana* | 125+600 | 4510 | -73,856 | 6,743522 |
| 1/01/2024 | Reptilia | Iguanidae | *Iguana_iguana* | 0+300 | 4513 | -73,8734 | 6,742222 |
| 1/01/2024 | Mammalia | Procyonidae | *Procyon_cancrivorus* | 114+100 | 4510 | -73,8734 | 6,742222 |
| 2/01/2024 | Mammalia | Sciuridae | *Sciurus_granatensis* | 83+700 | 4511 | -73,8578 | 6,74088 |
| 3/01/2024 | Mammalia | Procyonidae | *Procyon_cancrivorus* | 141+500 | 4511 | -73,8628 | 6,735549 |
| 9/01/2024 | Mammalia | Canidae | *Cerdocyon_thous* | 88+000 | 4511 | -73,8687 | 6,729297 |
| 9/01/2024 | Mammalia | Canidae | *Cerdocyon_thous* | 125+000 | 4511 | -73,8865 | 6,703602 |
| 9/01/2024 | Aves | Falconidae | *Milvago_chimachima* | 93+700 | 4511 | -73,8717 | 6,726062 |
| 9/01/2024 | Mammalia | Procyonidae | *Procyon_cancrivorus* | 28+060 | 4511 | -73,8636 | 6,735004 |
| 9/01/2024 | Mammalia | Procyonidae | *Procyon_cancrivorus* | 26+600 | 4511 | -73,8686 | 6,729389 |
| 9/01/2024 | Amphibia | Bufonidae | *Rhinella_marina* | 93+700 | 4511 | -73,8723 | 6,725562 |
| 9/01/2024 | Mammalia | Myrmecophagidae | *Tamandua_mexicana* | 114+600 | 4511 | -73,8865 | 6,703603 |
| 10/01/2024 | Reptilia | Crocodylidae | *Caiman_crocodilus* | 73+300 | 4510 | -73,9247 | 6,671692 |
| 10/01/2024 | Aves | Falconidae | *Caracara_cheriway* | 64+600 | 4510 | -73,9002 | 6,693134 |
| 10/01/2024 | Mammalia | Canidae | *Cerdocyon_thous* | 128+000 | 4510 | -73,9002 | 6,693134 |
| 10/01/2024 | Aves | Cuculidae | *Crotophaga_ani* | 56+500 | 4510 | -73,926 | 6,670458 |
| 10/01/2024 | Reptilia | Iguanidae | *Iguana_iguana* | 49+950 | 4510 | -73,8898 | 6,698728 |
| 10/01/2024 | Reptilia | Iguanidae | *Iguana_iguana* | 110+800 | 4510 | -73,9044 | 6,690304 |
| 10/01/2024 | Mammalia | Procyonidae | *Nasua_nasua* | 62+600 | 4510 | -73,9253 | 6,671079 |
| 10/01/2024 | Mammalia | Procyonidae | *Procyon_cancrivorus* | 46+500 | 4510 | -73,8884 | 6,699925 |
| 10/01/2024 | Mammalia | Procyonidae | *Procyon_cancrivorus* | 46+500 | 4510 | -73,9002 | 6,693134 |
| 10/01/2024 | Mammalia | Procyonidae | *Procyon_cancrivorus* | 101+500 | 4510 | -73,9044 | 6,690304 |
| 10/01/2024 | Mammalia | Myrmecophagidae | *Tamandua_mexicana* | 59+990 | 4510 | -73,8898 | 6,698728 |
| 10/01/2024 | Mammalia | Myrmecophagidae | *Tamandua_mexicana* | 97+300 | 4510 | -73,9187 | 6,677146 |
| 10/01/2024 | Mammalia | Myrmecophagidae | *Tamandua_mexicana* | 77+500 | 4510 | -73,9192 | 6,676934 |
| 10/01/2024 | Reptilia | Emydidae | *Trachemys_callirostris* | 64+600 | 4511 | -73,9002 | 6,693134 |
| 13/01/2024 | Mammalia | Felidae | *Leopardus_pardalis* | 33+300 | 4511 | -73,93 | 6,666792 |
| 14/01/2024 | Mammalia | Felidae | *Leopardus_pardalis* | 91+140 | 4511 | -73,93 | 6,666792 |
| 14/01/2024 | Mammalia | Procyonidae | *Procyon_cancrivorus* | 123+860 | 4510 | -73,93 | 6,666792 |
| 19/01/2024 | Mammalia | Caviidae | *hydrochoerus_isthmius* | 42+500 | 4511 | -73,9373 | 6,660019 |
| 22/01/2024 | Aves | Ardeidae | *Ardea_alba* | 112+150 | 4510 | -73,9863 | 6,614179 |
| 22/01/2024 | Mammalia | Procyonidae | *Procyon_cancrivorus* | 26+550 | 4511 | -73,9863 | 6,614179 |
| 22/01/2024 | Reptilia | Geoemydidae | *Rhinoclemmys_melanosterna* | 3+600 | 4511 | -73,9863 | 6,614179 |
| 22/01/2024 | Aves | Ardeidae | *Tigrisoma_lineatum* | 30+760 | 4511 | -73,9863 | 6,614179 |
| 22/01/2024 | Reptilia | Emydidae | *Trachemys_callirostris* | 39+400 | 4511 | -73,9863 | 6,614179 |
| 23/01/2024 | Reptilia | Crocodylidae | *Caiman_crocodilus* | 28+100 | 4511 | -73,9872 | 6,613259 |
| 24/01/2024 | Mammalia | Myrmecophagidae | *Tamandua_mexicana* | 93+110 | 4510 | -74,0768 | 6,528583 |
| 25/01/2024 | Mammalia | Myrmecophagidae | *Tamandua_mexicana* | 41+200 | 4511 | -74,0962 | 6,524383 |
| 26/01/2024 | Mammalia | Felidae | *Leopardus_pardalis* | 121+400 | 4510 | -74,1012 | 6,521126 |
| 30/01/2024 | Mammalia | Caviidae | *hydrochoerus_isthmius* | 125+100 | 4510 | -74,2056 | 6,483243 |
| 5/02/2024 | Mammalia | Procyonidae | *Procyon_cancrivorus* | 48+500 | 4511 | -74,2615 | 6,480548 |
| 20/02/2024 | Mammalia | Procyonidae | *Nasua_nasua* | 102+050 | 4511 | -74,2614 | 6,480483 |
| 20/02/2024 | Reptilia | Emydidae | *Trachemys_callirostris* | 108+450 | 4510 | -74,2614 | 6,480489 |
| 21/02/2024 | Mammalia | Caviidae | *hydrochoerus_isthmius* | 113+200 | 4510 | -74,2567 | 6,478341 |
| 21/02/2024 | Mammalia | Caviidae | *hydrochoerus_isthmius* | 113+200 | 4510 | -74,2566 | 6,478132 |
| 24/02/2024 | Mammalia | Atelidae | *Alouatta_seniculus* | 120+850 | 4510 | -74,2566 | 6,478132 |
| 1/03/2024 | Mammalia | Felidae | *Herpailurus_yagouaroundi* | 134+100 | 4511 | -74,2566 | 6,478132 |
| 1/03/2024 | Mammalia | Felidae | *Herpailurus_yagouaroundi* | 134+000 | 4511 | -73,714 | 6,938518 |
| 1/03/2024 | Mammalia | Caviidae | *hydrochoerus_isthmius* | 145+900 | 4511 | -74,2564 | 6,478121 |
| 1/03/2024 | Mammalia | Myrmecophagidae | *Tamandua_mexicana* | 145+900 | 4511 | -74,2564 | 6,478121 |
| 2/03/2024 | Aves | Picidae | *Melanerpes_rubricapillus* | 8+900 | 4511 | -74,2564 | 6,478121 |
| 8/03/2024 | Mammalia | Caviidae | *hydrochoerus_isthmius* | 132+240 | 4511 | -74,2566 | 6,47787 |
| 13/03/2024 | Reptilia | Viperidae | *Bothrosp_asper* | 108+500 | 4511 | -74,3088 | 6,443673 |
| 15/03/2024 | Reptilia | Emydidae | *Trachemys_callirostris* | 86+200 | 4511 | -74,2418 | 6,47521 |
| 17/03/2024 | Mammalia | Didelphidae | *Didelphis_marsupialis* | 126+400 | 4511 | -74,5551 | 6,214685 |
| 17/03/2024 | Aves | Thraupidae | *Sicalis_flaveola* | 84+700 | 4510 | -74,5636 | 5,866527 |
| 18/03/2024 | Aves | Cathartidae | *Coragyps_atratus* | 100+400 | 4511 | -74,2891 | 6,460394 |
| 18/03/2024 | Aves | Cathartidae | *Coragyps_atratus* | 99+200 | 4511 | -74,2891 | 6,460391 |
| 18/03/2024 | Mammalia | Didelphidae | *Didelphis_marsupialis* | 141+300 | 4511 | -74,3166 | 6,436042 |
| 18/03/2024 | Mammalia | Myrmecophagidae | *Tamandua_mexicana* | 86+000 | 4511 | -74,2984 | 6,449144 |
| 26/03/2024 | Mammalia | Canidae | *Cerdocyon_thous* | 114+800 | 4511 | -74,3508 | 6,413312 |
| 26/03/2024 | Aves | Cathartidae | *Coragyps_atratus* | 105+100 | 4511 | -74,3509 | 6,413594 |
| 27/03/2024 | Mammalia | Canidae | *Cerdocyon_thous* | 38+000 | 4510 | -74,3442 | 6,411425 |
| 1/04/2024 | Aves | Picidae | *Colaptes_punctigula* | 103+800 | 4511 | -74,3292 | 6,411262 |
| 2/04/2024 | Mammalia | Myrmecophagidae | *Tamandua_mexicana* | 124+500 | 4511 | -74,3297 | 6,410195 |
| 10/04/2024 | Aves | Falconidae | *Caracara_cheriway* | 96+700 | 4511 | -74,3583 | 6,403136 |
| 10/04/2024 | Mammalia | Canidae | *Cerdocyon_thous* | 111+200 | 4511 | -74,3587 | 6,402482 |
| 17/04/2024 | Mammalia | Myrmecophagidae | *Tamandua_mexicana* | 4+350 | 4513 | -74,3889 | 6,37972 |
| 18/04/2024 | Mammalia | Mustelidae | *Eyra_barbara* | 129+000 | 4511 | -74,4438 | 6,31393 |
| 23/04/2024 | Mammalia | Myrmecophagidae | *Tamandua_mexicana* | 124+000 | 4510 | -74,4447 | 6,312407 |
| 27/04/2024 | Reptilia | Crocodylidae | *Caiman_crocodilus* | 98+000 | 4511 | -74,4549 | 6,297502 |
| 27/04/2024 | Reptilia | Colubridae | *Spilotes_pullatus* | 100+970 | 4511 | -74,4592 | 6,291654 |
| 28/04/2024 | Mammalia | Noctilionidae | *Noctilio_albiventris* | 42+600 | 4511 | -74,4609 | 6,288332 |
| 28/04/2024 | Aves | Icteridae | *Quiscalus_lugubris* | 42+600 | 4511 | -74,4634 | 6,284667 |
| 28/04/2024 | Aves | Thraupidae | *Thraupis_episcopus* | 42+600 | 4511 | -74,4634 | 6,284667 |
| 2/05/2024 | Mammalia | Canidae | *Cerdocyon_thous* | 122+600 | 4511 | -74,4853 | 6,262198 |
| 3/05/2024 | Mammalia | Mustelidae | *Eyra_barbara* | 97+500 | 4511 | -74,4876 | 6,260293 |
| 3/05/2024 | Mammalia | Myrmecophagidae | *Tamandua_mexicana* | 87+800 | 4511 | -74,4922 | 6,256575 |
| 5/05/2024 | Mammalia | Caviidae | *hydrochoerus_isthmius* | 123+000 | 4511 | -74,4958 | 6,253658 |
| 7/05/2024 | Mammalia | Myrmecophagidae | *Tamandua_mexicana* | 0+690 | 4511 | -74,5023 | 6,247945 |
| 7/05/2024 | Mammalia | Myrmecophagidae | *Tamandua_mexicana* | 117+200 | 4511 | -74,5124 | 6,240317 |
| 7/05/2024 | Mammalia | Myrmecophagidae | *Tamandua_mexicana* | 125+500 | 4511 | -74,5235 | 6,232903 |
| 8/05/2024 | Mammalia | Myrmecophagidae | *Tamandua_mexicana* | 132+000 | 4511 | -74,5352 | 6,228343 |
| 9/05/2024 | Reptilia | Crocodylidae | *Caiman_crocodilus* | 121+150 | 4511 | -74,5439 | 6,224529 |
| 12/05/2024 | Mammalia | Myrmecophagidae | *Tamandua_mexicana* | 9+900 | 4511 | -74,544 | 6,224459 |
| 14/05/2024 | Mammalia | Choloepodidae | *Choloepus_hoffmani* | 110+300 | 4511 | -74,5453 | 6,223882 |
| 14/05/2024 | Aves | Falconidae | *Herpetotheres_cachinans* | 126+100 | 4511 | -74,5551 | 6,214685 |
| 14/05/2024 | Mammalia | Myrmecophagidae | *Tamandua_mexicana* | 9+900 | 4511 | -74,5559 | 6,209149 |
| 15/05/2024 | Aves | Tyrannidae | *Pitangus_sulphuratus* | 137+950 | 4511 | -74,5572 | 6,205174 |
| 16/05/2024 | Aves | Accipitridae | *Buteo_magnirostris* | 98+900 | 4511 | -74,558 | 6,202066 |
| 17/05/2024 | Mammalia | Canidae | *Cerdocyon_thous* | 141+800 | 4511 | -74,5588 | 6,192808 |
| 21/05/2024 | Reptilia | Crocodylidae | *Caiman_crocodilus* | 121+500 | 4511 | -74,5738 | 6,157334 |
| 22/05/2024 | Mammalia | Canidae | *Cerdocyon_thous* | 121+900 | 4511 | -74,5705 | 6,167532 |
| 23/05/2024 | Mammalia | Felidae | *Herpailurus_yagouaroundi* | 125+900 | 4510 | -74,5619 | 6,184405 |
| 27/05/2024 | Mammalia | Canidae | *Cerdocyon_thous* | 141+300 | 4511 | -74,5536 | 6,099101 |
| 27/05/2024 | Mammalia | Felidae | *Leopardus_pardalis* | 113+000 | 4510 | -74,5533 | 6,096157 |
| 27/05/2024 | Mammalia | Myrmecophagidae | *Tamandua_mexicana* | 148+000 | 4511 | -74,5541 | 6,106304 |
| 28/05/2024 | Mammalia | Myrmecophagidae | *Tamandua_mexicana* | 61+000 | 4511 | -74,5533 | 6,095966 |
| 7/06/2024 | Aves | Falconidae | *Caracara_plancus* | 87+300 | 4511 | -74,5516 | 6,080332 |
| 14/06/2024 | Mammalia | Felidae | *Leopardus_pardalis* | 33+900 | 4511 | -74,552 | 6,072828 |
| 25/06/2024 | Mammalia | Dasypodidae | *Dasypus_novemcinctus* | 102+260 | 4510 | -74,5598 | 6,049998 |
| 25/06/2024 | Mammalia | Mustelidae | *Lontra_longicaudis* | 8+000 | 4511 | -74,5596 | 6,04973 |
| 26/06/2024 | Mammalia | Chlamyphoridae | *Cabassous_centralis* | 124+000 | 4511 | -74,5561 | 6,047009 |
| 29/06/2024 | Mammalia | Myrmecophagidae | *Tamandua_mexicana* | 8+500 | 4511 | -74,5479 | 6,043672 |
| 29/06/2024 | Mammalia | Myrmecophagidae | *Tamandua_mexicana* | 103+500 | 4511 | -74,5475 | 6,043002 |
| 30/06/2024 | Mammalia | Caviidae | *Hydrochoerus_isthmius* | 102+260 | 4510 | -74,5467 | 6,041894 |
| 3/07/2024 | Reptilia | Boidae | *Epicrates_maurus* | 140+290 | 4511 | -74,5453 | 6,026546 |
| 3/07/2024 | Mammalia | Caviidae | *Hydrochoerus_isthmius* | 2+100 | 4511 | -74,5555 | 6,024542 |
| 15/07/2024 | Mammalia | Caviidae | *Hydrochoerus_isthmius* | 42+100 | 4511 | -74,5557 | 6,024041 |
| 22/07/2024 | Aves | Cathartidae | *Coragyps_atratus* | 133+500 | 4511 | -74,5572 | 6,004083 |
| 22/07/2024 | Reptilia | Geoemydidae | *Rhinoclemmys_melanosterna* | 88+100 | 4511 | -74,5547 | 6,000017 |
| 23/07/2024 | Mammalia | Canidae | *Cerdocyon_thous* | 99+300 | 4511 | -74,5629 | 5,975979 |
| 26/07/2024 | Mammalia | Myrmecophagidae | *Tamandua_mexicana* | 130+200 | 4511 | -74,5655 | 5,972553 |
| 30/07/2024 | Mammalia | Myrmecophagidae | *Tamandua_mexicana* | 121+700 | 4511 | -74,5666 | 5,970219 |
| 31/07/2024 | Mammalia | Canidae | *Cerdocyon_thous* | 29+609 | 4511 | -74,5643 | 5,961616 |
| 2/08/2024 | Reptilia | Boidae | *Epicrates_maurus* | 147+350 | 4511 | -74,5695 | 5,942086 |
| 2/08/2024 | Mammalia | Myrmecophagidae | *Tamandua_mexicana* | 147+200 | 4511 | -74,5684 | 5,946951 |
| 2/08/2024 | Mammalia | Myrmecophagidae | *Tamandua_mexicana* | 38+000 | 4511 | -74,5679 | 5,93491 |
| 5/08/2024 | Mammalia | Caviidae | *Hydrochoerus_isthmius* | 122+650 | 4510 | -74,5669 | 5,92203 |
| 5/08/2024 | Reptilia | Colubridae | *Mastigodryas_pleei* | 132+000 | 4511 | -74,567 | 5,928868 |
| 12/08/2024 | Mammalia | Procyonidae | *Procyon_cancrivorus* | 110+200 | 4510 | -74,5628 | 5,910425 |
| 19/08/2024 | Reptilia | Crocodylidae | *Caiman_crocodilus* | 113+000 | 4510 | -74,5874 | 5,819076 |
| 19/08/2024 | Aves | Falconidae | *Caracara_plancus* | 131+000 | 4510 | -74,5853 | 5,827243 |
| 23/08/2024 | Aves | Thraupidae | *Thraupis_episcopus* | 61+000 | 4511 | -74,5954 | 5,802956 |
| 26/08/2024 | Mammalia | Felidae | *Puma_concolor* | 108+000 | 4510 | -74,6227 | 5,722991 |
| 26/08/2024 | Mammalia | Myrmecophagidae | *Tamandua_mexicana* | 43+100 | 4510 | -74,6335 | 5,75927 |
| 5/09/2024 | Mammalia | Procyonidae | *Procyon_cancrivorus* | 28+350 | 4511 | -74,6116 | 5,682982 |
| 8/09/2024 | Aves | Tyrannidae | *Tyrannus_melancholicus* | 50+670 | 4511 | -74,6125 | 5,677473 |
| 24/09/2024 | Mammalia | Myrmecophagidae | *Tamandua_mexicana* | 11+950 | 4511 | -74,4429 | 6,316313 |
| 10/10/2024 | Reptilia | Boidae | *Boa_constrictor* | 16+750 | 4511 | -74,4275 | 6,352878 |
| 11/10/2024 | Reptilia | Boidae | *Boa_constrictor* | 17+500 | 4511 | -74,4222 | 6,358941 |
| 11/10/2024 | Mammalia | Molossidae | *Molossus_molossus* | 17+800 | 4511 | -74,4208 | 6,361064 |
| 14/10/2024 | Reptilia | Boidae | *Boa_constrictor* | 124+600 | 4511 | -73,7252 | 6,924195 |
| 14/10/2024 | Mammalia | Myrmecophagidae | *Tamandua_mexicana* | 145+200 | 4511 | -73,6351 | 7,085059 |
| 14/10/2024 | Mammalia | Myrmecophagidae | *Tamandua_mexicana* | 145+200 | 4511 | -73,635 | 7,085268 |
| 15/10/2024 | Mammalia | Myrmecophagidae | *Tamandua_mexicana* | 86+890 | 4511 | -73,9327 | 6,664217 |
| 16/10/2024 | Mammalia | Emballonuridae | *Rhynchonycteris_naso* | 91+550 | 4511 | -73,9005 | 6,692978 |
| 17/10/2024 | Reptilia | Crocodylidae | *Caiman_crocodilus* | 94+200 | 4511 | -73,8844 | 6,707677 |
| 17/10/2024 | Reptilia | Elapidae | *Micrurus_dumerilii* | 51+500 | 4511 | -74,1808 | 6,485794 |
| 17/10/2024 | Mammalia | Procyonidae | *Procyon_cancrivorus* | 107+200 | 4511 | -73,8064 | 6,79382 |
| 21/10/2024 | Reptilia | Colubridae | *Imantodes_cenchoa* | 68+200 | 4511 | -74,0551 | 6,5521 |
| 21/10/2024 | Aves | Cracidae | *Ortalis_columbiana* | 32+200 | 4511 | -74,3235 | 6,426267 |
| 22/10/2024 | Mammalia | Didelphidae | *Didelphis_marsupialis* | 80+400 | 4511 | -73,9732 | 6,625305 |
| 27/10/2024 | Mammalia | Cebidae | *Cebus_versicolor* | 127+100 | 4511 | -73,7104 | 6,942498 |
| 28/10/2024 | Mammalia | Caviidae | *Hydrochoerus_isthmius* | 73+700 | 4511 | -74,0183 | 6,585486 |
| 29/10/2024 | Aves | Ardeidae | *Ardea_alba* | 94+300 | 4511 | -73,8835 | 6,709737 |
| 29/10/2024 | Reptilia | Colubridae | *Mastigodryas_pleei* | 94+600 | 4511 | -73,8825 | 6,712246 |
| 29/10/2024 | Mammalia | Phyllostomidae | *Uroderma_bilobatum* | 95+000 | 4511 | -73,8809 | 6,7155 |
| 30/10/2024 | Aves | Icteridae | *Molothrus_bonariensis* | 98+500 | 4511 | -73,8601 | 6,739133 |
| 31/10/2024 | Aves | Rallidae | *Aramides_cajaneus* | 104+000 | 4511 | -73,8254 | 6,774183 |
| 1/11/2024 | Mammalia | Myrmecophagidae | *Tamandua_mexicana* | 15+850 | 4511 | -74,4303 | 6,34575 |
| 6/11/2024 | Aves | Cathartidae | *Coragyps_atratus* | 86+350 | 4511 | -73,9423 | 6,656149 |
| 7/11/2024 | Aves | Tyrannidae | *Pitangus_sulphuratus* | 42+000 | 4511 | -74,2616 | 6,480602 |
| 8/11/2024 | Reptilia | Colubridae | *Leptodeira_ornata* | 49+000 | 4511 | -74,2025 | 6,485051 |
| 8/11/2024 | Reptilia | Colubridae | *Tantilla_melanocephala* | 53+900 | 4511 | -74,1643 | 6,497399 |
| 9/11/2024 | Mammalia | Felidae | *Leopardus_pardalis* | 104+700 | 4511 | -73,8211 | 6,778662 |
| 14/11/2024 | Aves | Ardeidae | *Ardea_alba* | 122+000 | 4511 | -73,7389 | 6,906687 |
| 14/11/2024 | Aves | Tyrannidae | *Elaenia_flavogaster* | 123+100 | 4511 | -73,7333 | 6,914082 |
| 15/11/2024 | Mammalia | Myrmecophagidae | *Tamandua_mexicana* | 35+200 | 4511 | -74,3076 | 6,444739 |
| 17/11/2024 | Mammalia | Caviidae | *Hydrochoerus_isthmius* | 109+000 | 4511 | -73,7973 | 6,808791 |
| 19/11/2024 | Mammalia | Canidae | *Cerdocyon_thous* | 72+700 | 4511 | -74,025 | 6,579362 |
| 19/11/2024 | Aves | Cathartidae | *Coragyps_atratus* | 72+700 | 4511 | -74,025 | 6,579362 |
| 19/11/2024 | Reptilia | Geoemydidae | *Rhinoclemmys_melanosterna* | 70+000 | 4511 | -74,043 | 6,562991 |
| 19/11/2024 | Mammalia | Myrmecophagidae | *Tamandua_mexicana* | 70+100 | 4511 | -74,0424 | 6,563676 |
| 21/11/2024 | Mammalia | Caviidae | *Hydrochoerus_isthmius* | 28+200 | 4511 | -74,35 | 6,413355 |
| 29/11/2024 | Mammalia | Myrmecophagidae | *Tamandua_mexicana* | 29+200 | 4511 | -74,3416 | 6,410419 |
| 3/12/2024 | Reptilia | Crocodylidae | *Caiman_crocodilus* | 94+050 | 4511 | -73,885 | 6,706548 |
| 9/12/2024 | Aves | Tyrannidae | *Tyrannus_melancholicus* | 132+300 | 4510 | -74,5331 | 6,229019 |
| 15/12/2024 | Mammalia | Canidae | *Cerdocyon_thous* | 143+700 | 4511 | -73,6409 | 7,075212 |
| 16/12/2024 | Mammalia | Myrmecophagidae | *Tamandua_mexicana* | 128+700 | 4511 | -73,7054 | 6,954673 |
| 2/01/2025 | Mammalia | Canidae | *Cerdocyon_thous* | 122+750 | 4511 | -73,7347 | 6,912049 |
| 2/01/2025 | Reptilia | Iguanidae | *Iguana_iguana* | 51+000 | 4511 | -74,1844 | 6,486194 |
| 2/01/2025 | Aves | Cracidae | *Ortalis_columbiana* | 122+550 | 4511 | -73,7361 | 6,910286 |
| 3/01/2025 | Aves | Trochilidae | *Amazilia_sp* | 51+700 | 4511 | -74,1781 | 6,487556 |
| 3/01/2025 | Reptilia | Emydidae | *Trachemys_callirostris* | 86+200 | 4511 | -73,9373 | 6,660057 |
| 9/01/2025 | Mammalia | Procyonidae | *Procyon_cancrivorus* | 12+950 | 4511 | -74,4398 | 6,322274 |
| 13/01/2025 | Reptilia | Iguanidae | *Iguana_iguana* | 48+150 | 4511 | -74,2088 | 6,482417 |
| 13/01/2025 | Reptilia | Iguanidae | *Iguana_iguana* | 55+100 | 4511 | -74,1497 | 6,498747 |
| 13/01/2025 | Mammalia | Procyonidae | *Procyon_cancrivorus* | 43+200 | 4511 | -74,2501 | 6,476035 |
| 13/01/2025 | Mammalia | Sciuridae | *Sciurus_granatensis* | 106+050 | 4511 | -73,8125 | 6,78648 |
| 13/01/2025 | Mammalia | Myrmecophagidae | *Tamandua_mexicana* | 130+050 | 4511 | -73,7009 | 6,965387 |
| 14/01/2025 | Mammalia | Canidae | *Cerdocyon_thous* | 144+500 | 4511 | -73,6387 | 7,078936 |
| 16/01/2025 | Reptilia | Crocodylidae | *Caiman_crocodilus* | 96+900 | 4511 | -73,8705 | 6,727414 |
| 18/01/2025 | Mammalia | Canidae | *Cerdocyon_thous* | 109+260 | 4511 | -73,7965 | 6,809734 |
| 26/01/2025 | Reptilia | Crocodylidae | *Caiman_crocodilus* | 133+400 | 4511 | -74,5572 | 6,004083 |
| 30/01/2025 | Mammalia | Canidae | *Cerdocyon_thous* | 110+200 | 4511 | -74,5453 | 6,223882 |
| 30/01/2025 | Aves | Cathartidae | *Coragyps_atratus* | 97+950 | 4511 | -73,8666 | 6,731454 |
| 30/01/2025 | Aves | Cathartidae | *Coragyps_atratus* | 68+200 | 4511 | -74,0568 | 6,549593 |
| 30/01/2025 | Reptilia | Iguanidae | *Iguana_iguana* | 96+700 | 4511 | -74,3583 | 6,403136 |
| 30/01/2025 | Mammalia | Procyonidae | *Procyon_cancrivorus* | 42+300 | 4511 | -74,2587 | 6,480184 |
| 30/01/2025 | Mammalia | Myrmecophagidae | *Tamandua_mexicana* | 106+700 | 4511 | -73,809 | 6,790699 |
| 9/02/2025 | Mammalia | Cebidae | *Cebus_versicolor* | 64+300 | 4511 | -74,0799 | 6,525368 |
| 9/02/2025 | Aves | Cracidae | *Ortalis_columbiana* | 130+000 | 4511 | -73,7009 | 6,965387 |
| 14/02/2025 | Mammalia | Canidae | *Cerdocyon_thous* | 70+400 | 4510 | -74,0437 | 6,562073 |
| 21/02/2025 | Mammalia | Myrmecophagidae | *Tamandua_mexicana* | 142+800 | 4511 | -73,6459 | 7,066521 |
| 9/03/2025 | Mammalia | Procyonidae | *Procyon_cancrivorus* | 29+000 | 4511 | -74,3416 | 6,410419 |
| 13/03/2025 | Mammalia | Procyonidae | *Procyon_cancrivorus* | 145+900 | 4511 | -74,2564 | 6,478121 |
| 22/04/2025 | Mammalia | Felidae | *Herpailurus_yagouaroundi* | 140+000 | 4511 | -73,6861 | 6,998461 |
