# Supplementary material for: Crossing through danger: Spatial drivers of roadkill risk for felids in the fragmented Middle Magdalena valley
Source: Research Square preprint supplement (doi:10.21203/rs.3.rs-7198781/v1), 2025-08-01
Supplement: Supplementary file 2 [file c534a6af1b739f56186c78c1.docx]

**Supplementary Material 2.**

**Crossing through danger: Spatial drivers of roadkill risk for felids in the fragmented Middle Magdalena valley**

Julián Arango-Lozano1*, Karime Angarita-Corzo2

1Maestría en Ciencias Biológicas, Universidad de Caldas, Manizales, Colombia

2Escuela de Medicina Veterinaria. Facultad de Ciencias Agrarias. Universidad de Antioquia, Carrera 75 # 65-87, 050034, Medellín, Colombia.

* Corresponding author: [arangolozanoj1@gmail.com](mailto:arangolozanoj1@gmail.com)

**Data collection of felid species occurrences**.

A comprehensive database was built using Presence records of felid species obtained from public platforms such as iNaturalist, covering a time frame from 2018 to 2025. Each record was reviewed to ensure spatial accuracy and appropriate use; and Roadkill records, collected through systematic field surveys conducted between 2022 and 2025 along different sections of the *Ruta del Sol*. In total we recorded 15 roadkill events as follows: 9 of *Leopardus pardalis*, 5 of *Herpailurus yagouaroundi* and 1 of *Puma concolor* (**Table 2**) by surveying and 169 observation events from opportunistic encounters (camera trap) and iNaturalist records (mainly by camera traps) in all the 5 recognized felid species in the Middle Magdalena Valley (**Table 2**).


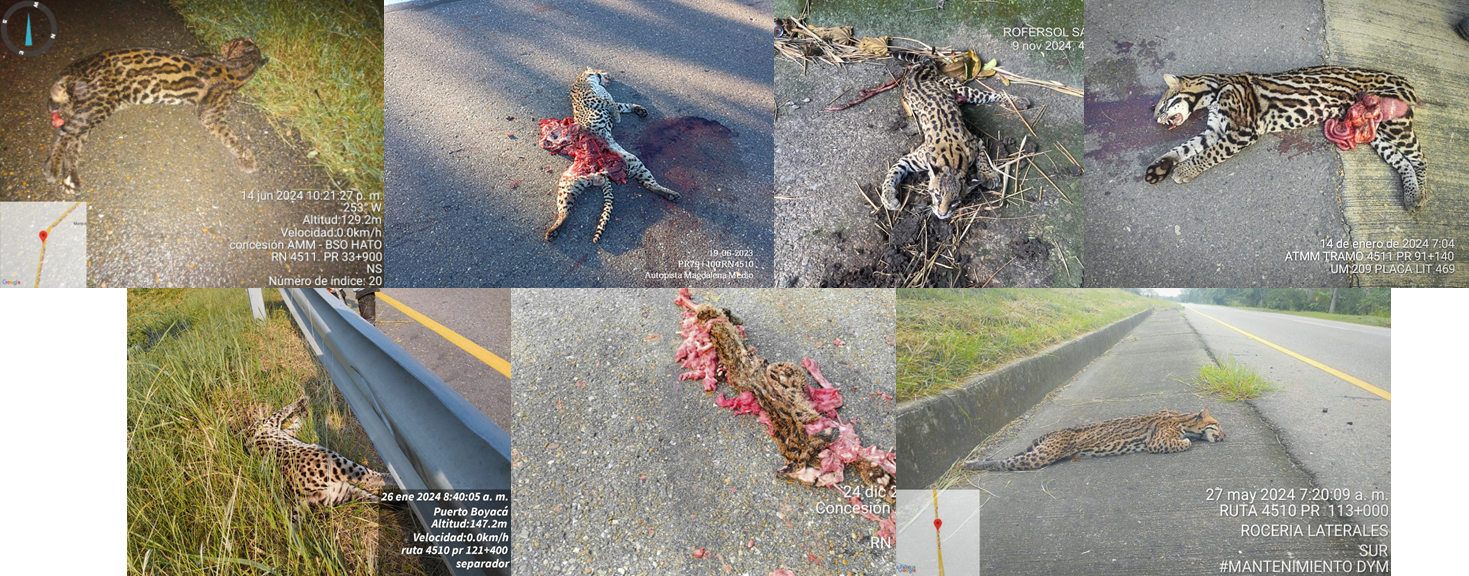


**Figure 1**. different records of *Leopardus pardalis* roadkilled.


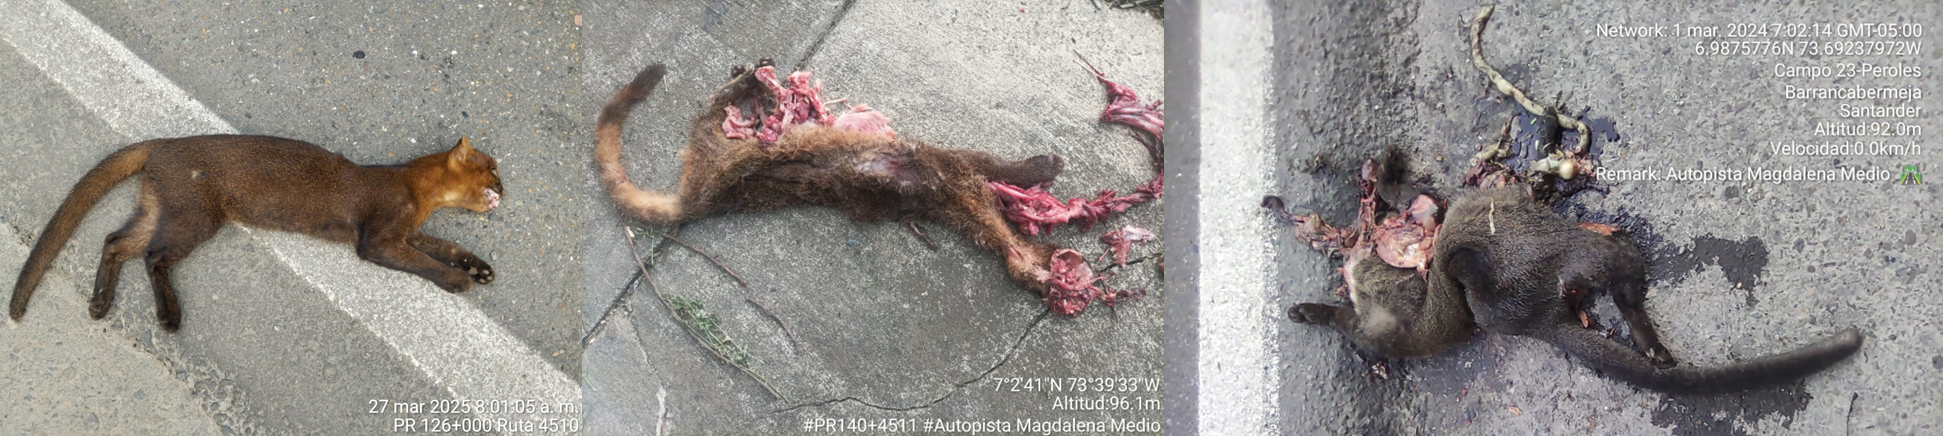


**Figure 2**. different records of *Herpailurus yagouaroundi* roadkilled.

**Table 2**. Description of the roadkilled felid species in the ruta del sol Highway. PK = Kilometer marker point, NR = National route.

| **Species** | **Event** | **X** | **Y** | **Source** |
| --- | --- | --- | --- | --- |
| *Herpailurus_yagouaroundi* | Atropellamiento | -74,256577 | 6,478132 | Authors |
| *Herpailurus_yagouaroundi* | Atropellamiento | -73,658974 | 7,045297 | Authors |
| *Herpailurus_yagouaroundi* | Atropellamiento | -73,686071 | 6,998461 | Authors |
| *Herpailurus_yagouaroundi* | Atropellamiento | -73,71403 | 6,938518 | Authors |
| *Herpailurus_yagouaroundi* | Atropellamiento | -74,561862 | 6,184405 | Authors |
| *Leopardus_pardalis* | Observación | -73,918143 | 6,579374 | Authors |
| *Leopardus_pardalis* | Observación | -73,921384 | 6,698685 | Authors |
| *Leopardus_pardalis* | Observación | -73,727598 | 6,838931 | Authors |
| *Leopardus_pardalis* | Observación | -73,70817 | 6,818191 | Authors |
| *Leopardus_pardalis* | Observación | -73,747647 | 7,077884 | Authors |
| *Leopardus_pardalis* | Atropellamiento | -74,488075 | 6,260016 | Authors |
| *Leopardus_pardalis* | Atropellamiento | -74,642408 | 5,482914 | Authors |
| *Leopardus_pardalis* | Atropellamiento | -73,871522 | 6,743528 | Authors |
| *Leopardus_pardalis* | Atropellamiento | -74,320371 | 6,432846 | Authors |
| *Leopardus_pardalis* | Atropellamiento | -73,930012 | 6,666792 | Authors |
| *Leopardus_pardalis* | Atropellamiento | -74,101242 | 6,521126 | Authors |
| *Leopardus_pardalis* | Atropellamiento | -74,553307 | 6,096157 | Authors |
| *Leopardus_pardalis* | Atropellamiento | -74,551989 | 6,072828 | Authors |
| *Leopardus_pardalis* | Atropellamiento | -73,82105 | 6,778662 | Authors |
| *Panthera_onca* | Observación | -74,67272 | 6,096083 | Authors |
| *Puma_concolor* | Atropellamiento | -74,622717 | 5,722991 | Authors |
| *Herpailurus_yagouaroundi* | Observación | -73,692169 | 7,071933 | iNaturalist |
| *Herpailurus_yagouaroundi* | Observación | -73,736801 | 7,072615 | iNaturalist |
| *Herpailurus_yagouaroundi* | Observación | -73,748646 | 7,080717 | iNaturalist |
| *Herpailurus_yagouaroundi* | Observación | -74,678578 | 6,069502 | iNaturalist |
| *Herpailurus_yagouaroundi* | Observación | -74,210861 | 6,805333 | iNaturalist |
| *Herpailurus_yagouaroundi* | Observación | -73,45821 | 6,975458 | iNaturalist |
| *Herpailurus_yagouaroundi* | Observación | -73,403376 | 7,104182 | iNaturalist |
| *Herpailurus_yagouaroundi* | Observación | -73,872079 | 7,089485 | INaturalist |
| *Herpailurus_yagouaroundi* | Observación | -73,403376 | 7,104182 | iNaturalist |
| *Herpailurus_yagouaroundi* | Observación | -73,679822 | 6,809017 | iNaturalist |
| *Herpailurus_yagouaroundi* | Observación | -74,711941 | 5,47015 | iNaturalist |
| *Leopadus_wiedii* | Observación | -74,177879 | 6,459947 | iNaturalist |
| *Leopadus_wiedii* | Observación | -74,168232 | 6,416974 | iNaturalist |
| *Leopadus_wiedii* | Observación | -74,119244 | 6,525333 | iNaturalist |
| *Leopadus_wiedii* | Observación | -74,088909 | 6,556896 | iNaturalist |
| *Leopadus_wiedii* | Observación | -73,891082 | 6,592056 | iNaturalist |
| *Leopadus_wiedii* | Observación | -73,768439 | 6,749895 | iNaturalist |
| *Leopadus_wiedii* | Observación | -73,688757 | 6,789981 | iNaturalist |
| *Leopadus_wiedii* | Observación | -73,994749 | 6,159889 | iNaturalist |
| *Leopadus_wiedii* | Observación | -73,845658 | 6,528015 | iNaturalist |
| *Leopadus_wiedii* | Observación | -73,812233 | 6,528824 | iNaturalist |
| *Leopadus_wiedii* | Observación | -74,162327 | 6,231705 | iNaturalist |
| *Leopadus_wiedii* | Observación | -74,993021 | 5,717035 | iNaturalist |
| *Leopadus_wiedii* | Observación | -74,972222 | 5,669248 | iNaturalist |
| *Leopadus_wiedii* | Observación | -74,938135 | 5,619882 | iNaturalist |
| *Leopadus_wiedii* | Observación | -74,998438 | 5,600871 | iNaturalist |
| *Leopadus_wiedii* | Observación | -74,914751 | 5,776978 | iNaturalist |
| *Leopadus_wiedii* | Observación | -74,825624 | 5,662999 | iNaturalist |
| *Leopadus_wiedii* | Observación | -74,825624 | 5,776121 | iNaturalist |
| *Leopadus_wiedii* | Observación | -74,939604 | 5,692136 | iNaturalist |
| *Leopadus_wiedii* | Observación | -74,042709 | 6,234612 | iNaturalist |
| *Leopadus_wiedii* | Observación | -74,12573 | 6,325667 | iNaturalist |
| *Leopadus_wiedii* | Observación | -74,187327 | 6,325667 | iNaturalist |
| *Leopadus_wiedii* | Observación | -74,190005 | 6,372534 | iNaturalist |
| *Leopadus_wiedii* | Observación | -74,104305 | 6,39128 | iNaturalist |
| *Leopadus_wiedii* | Observación | -73,994503 | 6,455555 | iNaturalist |
| *Leopadus_wiedii* | Observación | -73,931568 | 6,414044 | iNaturalist |
| *Leopadus_wiedii* | Observación | -73,932907 | 6,521168 | iNaturalist |
| *Leopadus_wiedii* | Observación | -73,772221 | 6,610884 | iNaturalist |
| *Leopardus_pardalis* | Observación | -74,678134 | 6,068845 | iNaturalist |
| *Leopardus_pardalis* | Observación | -74,523563 | 6,057343 | iNaturalist |
| *Leopardus_pardalis* | Observación | -74,14183 | 6,463589 | iNaturalist |
| *Leopardus_pardalis* | Observación | -73,665428 | 6,839807 | iNaturalist |
| *Leopardus_pardalis* | Observación | -73,691164 | 6,803085 | iNaturalist |
| *Leopardus_pardalis* | Observación | -73,747647 | 7,077884 | iNaturalist |
| *Leopardus_pardalis* | Observación | -74,547051 | 6,042448 | iNaturalist |
| *Leopardus_pardalis* | Observación | -73,768787 | 6,856745 | iNaturalist |
| *Leopardus_pardalis* | Observación | -73,921521 | 6,705069 | iNaturalist |
| *Leopardus_pardalis* | Observación | -73,921055 | 6,702952 | iNaturalist |
| *Leopardus_pardalis* | Observación | -73,874357 | 6,734441 | iNaturalist |
| *Leopardus_pardalis* | Observación | -73,870041 | 6,735517 | iNaturalist |
| *Leopardus_pardalis* | Observación | -73,870646 | 6,735185 | iNaturalist |
| *Leopardus_pardalis* | Observación | -73,78941 | 6,821999 | iNaturalist |
| *Leopardus_pardalis* | Observación | -74,283605 | 6,45287 | iNaturalist |
| *Leopardus_pardalis* | Observación | -74,282455 | 6,452394 | iNaturalist |
| *Leopardus_pardalis* | Observación | -74,282085 | 6,453037 | iNaturalist |
| *Leopardus_pardalis* | Observación | -73,561179 | 7,13785 | iNaturalist |
| *Leopardus_pardalis* | Observación | -74,472285 | 6,274262 | iNaturalist |
| *Leopardus_pardalis* | Observación | -74,255898 | 6,038311 | iNaturalist |
| *Leopardus_pardalis* | Observación | -74,609133 | 5,777273 | iNaturalist |
| *Leopardus_pardalis* | Observación | -74,959035 | 5,602877 | iNaturalist |
| *Leopardus_pardalis* | Observación | -74,846844 | 5,776162 | iNaturalist |
| *Leopardus_pardalis* | Observación | -74,847955 | 5,801711 | iNaturalist |
| *Leopardus_pardalis* | Observación | -74,826849 | 5,933896 | iNaturalist |
| *Leopardus_pardalis* | Observación | -74,669249 | 6,06266 | iNaturalist |
| *Leopardus_pardalis* | Observación | -74,644196 | 6,548128 | iNaturalist |
| *Leopardus_pardalis* | Observación | -74,513161 | 6,591351 | iNaturalist |
| *Leopardus_pardalis* | Observación | -74,10123 | 6,413851 | iNaturalist |
| *Leopardus_pardalis* | Observación | -73,907862 | 6,324276 | iNaturalist |
| *Leopardus_pardalis* | Observación | -73,903938 | 6,545398 | iNaturalist |
| *Leopardus_pardalis* | Observación | -74,206775 | 6,767248 | iNaturalist |
| *Leopardus_pardalis* | Observación | -74,20561 | 6,83131 | iNaturalist |
| *Leopardus_pardalis* | Observación | -74,20561 | 6,798114 | iNaturalist |
| *Leopardus_pardalis* | Observación | -73,689185 | 6,829763 | iNaturalist |
| *Leopardus_pardalis* | Observación | -73,854544 | 7,072866 | iNaturalist |
| *Leopardus_pardalis* | Observación | -73,68037 | 7,115521 | iNaturalist |
| *Leopardus_pardalis* | Observación | -73,617099 | 7,027368 | iNaturalist |
| *Panthera_onca* | Observación | -73,914537 | 6,61745 | iNaturalist |
| *Panthera_onca* | Observación | -73,951134 | 6,706471 | iNaturalist |
| *Panthera_onca* | Observación | -73,607943 | 7,016607 | iNaturalist |
| *Panthera_onca* | Observación | -73,713304 | 7,048847 | iNaturalist |
| *Panthera_onca* | Observación | -73,654929 | 7,061005 | iNaturalist |
| *Panthera_onca* | Observación | -73,603126 | 7,111734 | iNaturalist |
| *Panthera_onca* | Observación | -73,789211 | 7,154343 | iNaturalist |
| *Panthera_onca* | Observación | -73,498756 | 7,226266 | iNaturalist |
| *Panthera_onca* | Observación | -73,921055 | 6,702952 | iNaturalist |
| *Panthera_onca* | Observación | -73,944057 | 6,354693 | iNaturalist |
| *Panthera_onca* | Observación | -74,512172 | 6,458918 | iNaturalist |
| *Panthera_onca* | Observación | -74,292622 | 6,6791 | iNaturalist |
| *Panthera_onca* | Observación | -74,337487 | 6,68025 | iNaturalist |
| *Panthera_onca* | Observación | -74,360494 | 6,744672 | iNaturalist |
| *Panthera_onca* | Observación | -74,292622 | 6,742371 | iNaturalist |
| *Panthera_onca* | Observación | -74,510044 | 6,765379 | iNaturalist |
| *Panthera_onca* | Observación | -74,271409 | 6,809507 | iNaturalist |
| *Panthera_onca* | Observación | -74,272882 | 6,827913 | iNaturalist |
| *Panthera_onca* | Observación | -74,29276 | 6,853682 | iNaturalist |
| *Panthera_onca* | Observación | -74,251531 | 6,854418 | iNaturalist |
| *Panthera_onca* | Observación | -74,204411 | 6,854418 | iNaturalist |
| *Panthera_onca* | Observación | -74,007328 | 6,742371 | iNaturalist |
| *Panthera_onca* | Observación | -73,948659 | 6,702108 | iNaturalist |
| *Panthera_onca* | Observación | -73,745042 | 7,004657 | iNaturalist |
| *Panthera_onca* | Observación | -73,681771 | 7,028815 | iNaturalist |
| *Panthera_onca* | Observación | -73,616524 | 7,008068 | iNaturalist |
| *Panthera_onca* | Observación | -73,639142 | 7,028272 | iNaturalist |
| *Panthera_onca* | Observación | -73,595113 | 7,028876 | iNaturalist |
| *Panthera_onca* | Observación | -73,616524 | 7,052398 | iNaturalist |
| *Panthera_onca* | Observación | -73,746499 | 7,051191 | iNaturalist |
| *Panthera_onca* | Observación | -73,770021 | 7,073206 | iNaturalist |
| *Panthera_onca* | Observación | -73,703413 | 7,093844 | iNaturalist |
| *Panthera_onca* | Observación | -73,683151 | 7,094786 | iNaturalist |
| *Panthera_onca* | Observación | -73,660534 | 7,074525 | iNaturalist |
| *Panthera_onca* | Observación | -73,660063 | 7,114105 | iNaturalist |
| *Panthera_onca* | Observación | -73,634618 | 7,138136 | iNaturalist |
| *Panthera_onca* | Observación | -73,61954 | 7,138607 | iNaturalist |
| *Panthera_onca* | Observación | -73,592682 | 7,137665 | iNaturalist |
| *Panthera_onca* | Observación | -73,617655 | 7,092902 | iNaturalist |
| *Panthera_onca* | Observación | -73,682209 | 7,160754 | iNaturalist |
| *Panthera_onca* | Observación | -73,661476 | 7,160754 | iNaturalist |
| *Panthera_onca* | Observación | -73,638388 | 7,181957 | iNaturalist |
| *Panthera_onca* | Observación | -73,683151 | 7,202219 | iNaturalist |
| *Panthera_onca* | Observación | -73,748176 | 7,182429 | iNaturalist |
| *Panthera_onca* | Observación | -73,7298 | 7,180073 | iNaturalist |
| *Panthera_onca* | Observación | -73,726972 | 7,161225 | iNaturalist |
| *Panthera_onca* | Observación | -73,746291 | 7,117875 | iNaturalist |
| *Panthera_onca* | Observación | -73,87964 | 7,203632 | iNaturalist |
| *Panthera_onca* | Observación | -74,359344 | 6,937935 | iNaturalist |
| *Panthera_onca* | Observación | -74,293772 | 6,918379 | iNaturalist |
| *Panthera_onca* | Observación | -74,274216 | 6,917229 | iNaturalist |
| *Panthera_onca* | Observación | -74,231652 | 6,917229 | iNaturalist |
| *Panthera_onca* | Observación | -74,229351 | 7,006958 | iNaturalist |
| *Panthera_onca* | Observación | -74,184486 | 7,004657 | iNaturalist |
| *Puma_concolor* | Observación | -74,047008 | 6,372047 | iNaturalist |
| *Puma_concolor* | Observación | -74,232065 | 6,617651 | iNaturalist |
| *Puma_concolor* | Observación | -73,605556 | 7,041692 | iNaturalist |
| *Puma_concolor* | Observación | -73,606293 | 7,098346 | iNaturalist |
| *Puma_concolor* | Observación | -73,750131 | 7,061351 | iNaturalist |
| *Puma_concolor* | Observación | -73,707184 | 7,141767 | iNaturalist |
| *Puma_concolor* | Observación | -74,244254 | 6,66374 | iNaturalist |
| *Puma_concolor* | Observación | -74,235896 | 6,641369 | iNaturalist |
| *Puma_concolor* | Observación | -74,019192 | 6,284073 | iNaturalist |
| *Puma_concolor* | Observación | -73,952909 | 6,24114 | iNaturalist |
| *Puma_concolor* | Observación | -74,62553 | 6,436222 | iNaturalist |
| *Puma_concolor* | Observación | -74,779186 | 6,437729 | iNaturalist |
| *Puma_concolor* | Observación | -74,362206 | 6,656251 | iNaturalist |
| *Puma_concolor* | Observación | -74,381971 | 6,677462 | iNaturalist |
| *Puma_concolor* | Observación | -74,319785 | 6,720847 | iNaturalist |
| *Puma_concolor* | Observación | -74,272062 | 6,699637 | iNaturalist |
| *Puma_concolor* | Observación | -74,274954 | 6,676016 | iNaturalist |
| *Puma_concolor* | Observación | -74,253743 | 6,699155 | iNaturalist |
| *Puma_concolor* | Observación | -74,207466 | 6,743986 | iNaturalist |
| *Puma_concolor* | Observación | -74,315929 | 6,766643 | iNaturalist |
| *Puma_concolor* | Observación | -74,361724 | 6,810992 | iNaturalist |
| *Puma_concolor* | Observación | -74,362329 | 6,874264 | iNaturalist |
| *Puma_concolor* | Observación | -74,295245 | 6,962531 | iNaturalist |
| *Puma_concolor* | Observación | -74,205801 | 6,962531 | iNaturalist |
| *Puma_concolor* | Observación | -74,363506 | 6,983715 | iNaturalist |
| *Puma_concolor* | Observación | -73,594379 | 6,91602 | iNaturalist |
| *Puma_concolor* | Observación | -73,638819 | 7,068923 | iNaturalist |
| *Puma_concolor* | Observación | -73,835408 | 7,135959 | iNaturalist |

These animals have not only been found roadkilled, but also live on the road:

**
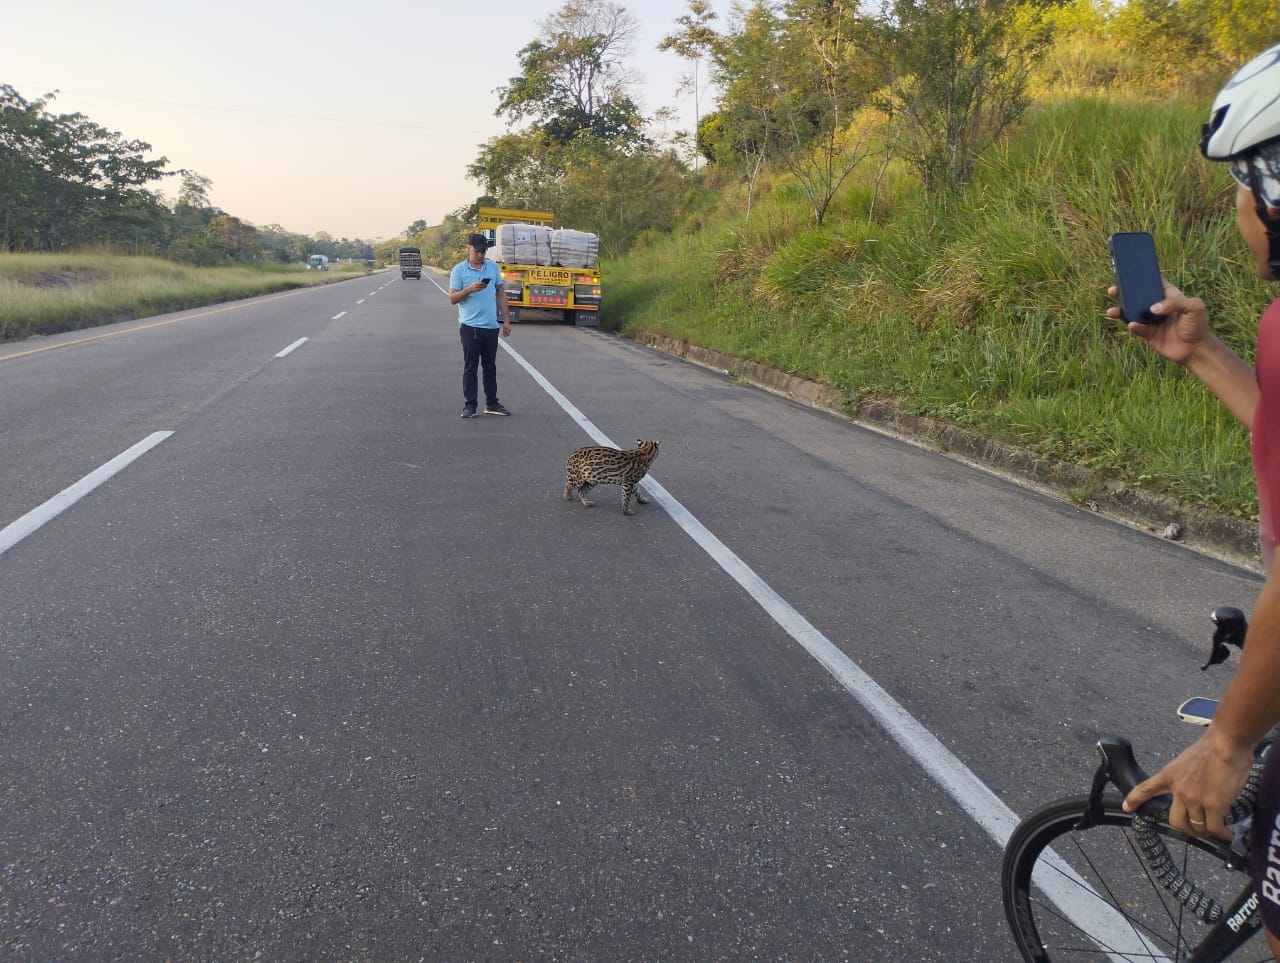
**

**Photograph 1.** Records of a living *Leopardus pardalis* crossing in the road being filmed by people May 27 of 2024. The precise location on the ruta del sol highway is unknown.
